# Supplementary material for: Generation of a Collision Cross Section Library for Multi-Dimensional Plant Metabolomics Using UHPLC-Trapped Ion Mobility-MS/MS
Source: Metabolites. 2019 Dec 24;10(1):13. doi: 10.3390/metabo10010013 (PMC7023306; doi:10.3390/metabo10010013)
Supplement: Supplementary file 1 [file metabolites-10-00013-s001.zip › supplementary-tables.xlsx]

## Sheet: Table S1. BRUKER Calibration
Compound	Ion	m/z	CCS [Å²] AVERAGE	CCS [Å²] STDEV	CCS %RSD
(+)-Catechin	[M-H]-	289.072	157.003	0.0981495	0.000625143
1,2-O-Isopropylidene-D-glucofuranose	[M-H]-	219.088	145.507	0.337522	0.00231962
2',4'-Dihydroxychalcone	[M-H]-	239.072	158.143	0.150111	0.000949209
2'-Hydroxy-4'-methoxychalcone	[M-H]-	253.087	163.43	0.0781025	0.000477896
2'-Hydroxy-4-methoxychalcone	[M-H]-	253.087	163.893	0.0493288	0.000300981
2'-Hydroxyflavone	[M-H]-	237.054	149.55	0.0781025	0.00052225
3(3',4'-Dimethoxyphenyl)-7-hydroxycoumarin	[M-H]-	297.077	171.46	0.160935	0.000938614
3',4',7,8-tetrahydroxy flavanone	[M-H]-	287.055	164.313	0.107858	0.000656416
3',4',7-Trihydroxyisoflavone	[M-H]-	269.046	161.31	0.043589	0.000270219
3',4'-Dihydroxyflavone	[M-H]-	253.051	154.743	0.208167	0.00134524
3',4'-Dimethoxy-7-hydroxyflavanone	[M-H]-	311.092	180.147	0.0635085	0.000352538
3,6,2',3'-Tetrahydroxyflavone	[M-H]-	285.041	160.247	0.0981495	0.00061249
3,6,2',4'-Tetrahydroxyflavone	[M-H]-	285.041	161.53	0.06245	0.000386615
3,6,3',4'-Tetrahydroxyflavone	[M-H]-	285.04	162.247	0.185023	0.00114038
3,7,3',4',5'-Pentrahydroxyflavone (robinetin)	[M-H]-	301.035	164.14	0.196977	0.00120006
3,7,3',4'-Tetrahydroxyflavanone (fustin)	[M-H]-	287.056	154.147	0.125033	0.000811132
3,7,4'-Trihydroxyflavone (5-Deoxykampferol)	[M-H]-	269.046	159.07	0.192873	0.0012125
3-Glc, 28-Glc medicagenic acid	[M-H]-	825.429	300.213	0.561902	0.00187167
3-Hyddroxyflavone	[M-H]-	237.055	151.787	0.185023	0.00121896
3'-Hydroxyflavone	[M-H]-	237.055	154.453	0.40501	0.00262222
4-Hydroxy-2',4',6'-trimethoxychalcone (flavokawain A)	[M-H]-	313.108	182.04	0.158745	0.000872034
4'-Hydroxyflavone	[M-H]-	237.056	151.783	0.1861	0.00122609
5,3',4'-Trihydroxyflavone	[M-H]-	269.045	155.98	0.18	0.00115399
5,4'-Dihydroxy-7-methoxyflavone (Genkwanin, 7-Methoxyapigenin)	[M-H]-	283.061	164.58	0.07	0.000425325
5,6-dihydroxy-3',4'-dimethoxy-flavanone	[M-H]-	315.088	175.993	0.175024	0.000994491
5,7,4'-trihydroxy-6,3',5'-trimethoxyflavone	[M-H]-	359.077	182.957	0.170098	0.000929717
5,7-Dihydroxy-2'-methoxyflavone	[M-H]-	283.061	166.843	0.0680686	0.000407979
5,7-dihydroxy-3',4'-dimethoxy-flavanone	[M-H]-	315.088	175.377	0.10504	0.000598938
5,7-Dihydroxy-4'-methoxyflavone	[M-H]-	285.077	170.353	0.102632	0.000602466
5,7-DIMETHOXY-4'-HYDROXYFLAVANONE	[M-H]-	299.092	173.577	0.275379	0.0015865
5,8-Dihydroxyflavanone	[M-H]-	255.066	157.95	0.01	6.33112e-05
5,8-Dimethoxyflavanone	[M-H+H2O]	301.108	171.687	0.125033	0.000728265
5-Hydroxy-3',4'-dimethoxyflavanone	[M-H]-	299.093	173.66	0.20664	0.00118991
5-Hydroxyferulic acid	[M-H]-	209.045	141.053	0.166533	0.00118064
5-Hydroxyflavone	[M-H]-	237.056	155.603	0.142945	0.000918651
6,7,3',4'-Tetrahydroxyflavanone	[M-H]-	287.056	167.197	0.0680686	0.000407117
6,7,4'-Trihydroxyisoflavone	[M-H]-	269.046	159.107	0.145717	0.000915842
6,8-diprenylnaringenin	[M-H]-	407.187	205.883	0.651178	0.00316285
6-geranylnaringenin	[M-H]-	407.187	203.927	0.16773	0.000822501
6-Hydroxyflavanone	[M-H]-	239.072	156.51	0.151327	0.000966887
6-Hydroxyflavone	[M-H]-	237.057	155.51	0.141067	0.000907127
6-prenylnaringenin	[M-H]-	339.124	187.387	0.470567	0.00251121
7,3',4',5'-Tetrahydroxyflavone	[M-H]-	285.04	161.507	0.0763763	0.000472899
7,3',4'-TRIHYDROXYISOFLAVONE	[M-H]-	269.045	162.12	0.20664	0.00127461
7,4'-dihydroxyflavone	[M-H]-	253.052	156.59	0.155885	0.000995495
7,4'-Dimethoxy-3-hydroxyflavone	[M-H]-	297.077	173.476	0.0738941	0.000425961
7,4'-Dimethoxy-5-hydroxyflavanone	[M-H]-	299.093	175.107	0.236291	0.00134941
7-Hyddroxyflavone	[M-H]-	237.056	153.28	0.0556776	0.000363241
7-hydroxy 3(4- methoxyphenyl) coumarin	[M-H]-	267.067	162.61	0.034641	0.000213031
7-Hydroxy-3'-methoxyflavone	[M-H]-	267.067	164.743	0.106927	0.000649051
7-Hydroxy-4'-methoxyflavone	[M-H]-	267.067	164.45	0.19	0.00115537
7-Methoxy-4'-hydroxyflavone	[M-H]-	267.067	163.84	0.306431	0.00187031
7-Methoxyflavanone	[M-H]-	253.087	163.247	0.0251661	0.00015416
8-Hydroxy-5-methoxyflavanone	[M-H]-	269.082	165.35	0.052915	0.000320018
8-prenylnaringenin	[M-H]-	339.124	182.92	0.31	0.00169473
Apigenin	[M-H]-	269.046	157.063	0.105987	0.000674807
Apigenin-7-neohesperidoside (Rhoifolin)	[M-H]-	577.155	224.957	0.126623	0.000562876
Apigenin-7-O-glucoside (apigetrin)	[M-H]-	431.098	205.9	0.145258	0.00070548
apiin	[M-H]-	563.14	222.927	0.257941	0.00115706
Artocarpin	[M-H]-	435.181	217.637	0.0493288	0.000226657
Asiatic acid	[M-H]-	487.343	221.813	0.190875	0.000860522
Aspalathin	[M-H]-	451.124	193.43	0.185203	0.000957466
Baicalein	[M-3]-	267.03	158.047	0.160104	0.00101302
bayogenin	[M-H]-	487.343	224.057	0.234379	0.00104607
Biochanin A (5,7-Dihydroxy-4'-methoxyisoflavone)	[M-H]-	283.062	165.693	0.130512	0.000787671
Boswellic acid, alpha	[M-H]-	455.353	221.353	0.296704	0.00134041
Cauloside C	[M-H+HCO2H]-	811.446	287.823	0.837218	0.00290879
Chlorogenic acid	[M-3]-	351.072	186.367	0.438216	0.00235137
Chrysin	[M-H]-	253.051	155.73	0.1	0.000642137
Cohumulone	[M-H]-	347.187	183.527	0.208167	0.00113426
Corosolic acid	[M-H]-	471.348	219.4	0.480312	0.00218921
Coumestrol	[M-H]-	267.03	155.257	0.155027	0.00099852
Daidzein	[M-H]-	253.051	157.14	0.043589	0.00027739
Demethyl medicarpin	[M-H]-	255.067	161.447	0.170098	0.00105359
Desmethylxanthohumol	[M-H]-	339.124	182.94	0.0953939	0.000521449
Desmethylxanthohumol	[M-H+Na+HCO2H]-	339.125	187.473	0.0907377	0.000484003
Dihydrokaempferol	[M-H]-	287.056	163.53	0.165227	0.00101038
Dihydroquercetin (Taxifolin)	[M-H]-	303.051	163.394	0.73498	0.0044982
Diosmetin	[M-H]-	299.056	170.72	0.18735	0.00109741
Diosmin	[M-H]-	607.165	232.683	0.231589	0.000995296
Eriodictyol	[M-H]-	287.056	165.49	0.108167	0.000653614
eriodictyol-7-neohesperidoside	[M-H]-	595.166	221.647	0.0896289	0.000404377
Eupatilin	[M-H]-	343.083	184.763	0.217792	0.00117876
Farrerol	[M-H]-	299.093	171.753	0.215484	0.00125461
Fisetin	[M-H]-	285.04	161.927	0.0208167	0.000128556
Formononetin	[M-H]-	267.067	163.3	0.314802	0.00192775
galangin	[M-H]-	269.045	156.517	0.110151	0.000703768
Gardenin E	[M-H]-	389.088	191.077	0.140119	0.000733313
Genistein	[M-H]-	269.046	159.5	0.191572	0.00120108
Genistin	[M-H]-	431.099	211.213	0.366379	0.00173464
Genistin	[M-H+HCO2H]-	477.103	219.603	0.543538	0.00247509
Glycitein	[M-H]-	283.062	166.353	0.120968	0.000727177
Glycyrrhetinic acid, 18 beta	[M-H]-	469.332	222.43	0.327414	0.00147199
Glycyrrhizic acid	[M-H]-	821.397	277.713	0.382143	0.00137603
Hederagenin	[M-H]-	471.348	221.357	0.300222	0.00135628
Heptadecanoic acid	[M-H]-	269.249	173.913	0.0208167	0.000119696
Hesperetin	[M-H]-	301.073	172.3	0.166433	0.00096595
Hesperidin	[M-H]-	609.183	229.1	0.165227	0.000721201
Hispidulin	[M-H]-	299.056	164.99	0.157162	0.000952557
Homoeriodictyol	[M-H]-	301.072	168.013	0.237136	0.00141141
Humulone	[M-H]-	361.203	187.893	0.361432	0.0019236
Hymenoxin	[M-H]-	373.093	189.793	0.085049	0.000448114
Icariin	[M-H+HCO2H]-	721.235	253.691	0.275196	0.00108477
isobavachin	[M-H]-	323.129	180.84	0.23	0.00127184
Isohumulone	[M-H]-	361.166	186.643	0.167432	0.000897067
Isoliquiritigenin	[M-H]-	255.066	158.943	0.0321455	0.000202245
Isorhoifolin	[M-H]-	577.155	229.927	0.083865	0.000364747
Isosakuranetin	[M-H]-	285.077	169.127	0.210079	0.00124214
Isosakuranin	[M-H]-	447.129	216.683	0.11547	0.000532898
Kaempferide	[M-H]-	299.056	166.547	0.333816	0.00200434
Kaempferol	[M-H]-	285.041	160.63	0.111355	0.000693241
kaempferol-3-O-glucoside	[M-H]-	447.093	199.593	0.295353	0.00147977
kaempferol-7-O-glucoside	[M-H]-	447.093	208.3	0.130767	0.000627782
Liquiritigenin	[M-H]-	255.066	158.847	0.0750555	0.000472503
Lupulone	[M-H]-	413.27	200.977	0.679289	0.00337994
Luteolin	[M-H]-	285.041	160.247	0.181475	0.00113248
Luteolin-7,3'-di-O-glucoside	[M-H]-	609.145	235.84	0.0458258	0.000194309
Madecassic acid	[M-H]-	503.337	222.893	0.247857	0.001112
medicagenic acid	[M-H]-	501.324	226.153	0.136504	0.00060359
Myristic acid	[M-H]-	227.202	162.24	0.1	0.000616371
Naringenin (+/-)	[M-H]-	271.061	162.55	0.160935	0.000990063
n-Decyl-beta-D-glucopyranoside	[M-H]-	319.213	188.697	0.355293	0.00188288
Neohesperidin	[M-H]-	609.181	225.76	0.0953939	0.000422546
neohesperidin dihydrochalcone	[M-H]-	611.197	231.097	0.343851	0.00148791
nevadensin	[M-H]-	343.083	182.2	0.122882	0.000674435
n-Octyl-beta-D-glucopyranoside	[M-H+HCO2H]-	337.187	189.337	0.196044	0.00103543
n-Pentadecanoic acid	[M-H]-	241.218	166.057	0.102144	0.000615113
n-Tridecanoic acid	[M-H]-	213.186	159.003	0.0550757	0.000346381
Oleanolic acid	[M-H]-	455.353	218.963	0.221886	0.00101335
Ononin (Formononetin 7-O-glucoside)	[M-H+HCO2H]-	475.125	222.349	0.206	0.000926471
Palmitic acid	[M-H]-	255.233	169.86	0.157162	0.000925246
Pratol	[M-H]-	267.067	165.267	0.209841	0.00126971
Prunetin	[M-H]-	283.062	167.247	0.0750555	0.000448771
Pseudoaptigenin	[M-H]-	281.046	164.263	0.150111	0.000913844
Pygenic acid A	[M-H]-	471.348	219.65	0.0781025	0.000355577
Pygenic acid B	[M-H]-	487.343	224.343	0.243379	0.00108485
Pygenic acid C	[M-H]-	503.338	223.16	0.396106	0.00177499
Quercitrin	[M-H]-	447.092	195.07	0.0556776	0.000285424
Resveratrol	[M-H]-	227.072	157	0	0
Rhoifolin	[M-H]-	577.155	224.927	0.66335	0.00294918
Rutin	[M-H]-	609.145	229.893	0.251462	0.00109382
sakuranetin	[M-H]-	285.077	168.05	0.28	0.00166617
Saponarin	[M-H]-	593.15	236.533	0.211266	0.000893177
S-Benzyl-N-carbobenzyloxy-L-cysteine	[M-H]-	344.096	263.62	0.654828	0.00248399
scaposin	[M-H]-	389.089	192.827	0.181751	0.00094256
Scutellarein-7-glucuronide	[M-3]-	459.057	191.36	0.351568	0.00183721
silychristin	[M-H]-	481.114	217.24	0.115326	0.000530867
Sinapic acid	[M-H]-	223.061	147.913	0.0680686	0.000460192
Sinapyl alcohol	[M-H]-	209.045	141.067	0.16773	0.00118901
Sorbifolin	[M-H]-	299.056	165.773	0.265393	0.00160094
soyasapogenol A	[M-H+HCO2H]-	519.369	235.597	0.104083	0.000441786
Stearic acid	[M-H]-	283.264	177.96	0.0173205	9.73281e-05
Tiliroside	[M-H]-	593.129	216.103	0.0208167	9.63273e-05
Ursolic acid	[M-H]-	455.354	216.85	0.30348	0.00139949
Xanthohumol	[M-H]-	353.141	195.753	0.20232	0.00103354

## Sheet: Table S2. Stow Calibration
Compound Names	Calculated m/z for Ion Annotation	Max. m/z from Mobilogram	ION	CCS [Å²] AVERAGE	CCS [Å²] STDEV	CCS %RSD	Class
Chlorogenic acid		191.057	[M-H]- unknown	170.52	0.60696	0.00355946
Sinapyl alcohol		209.046	adduct	147.57	0.115326	0.000781498
5-Hydroxyferulic acid	209.046	209.046	[M-H]-	141.26	0.043589	0.000308573
n-Tridecanoic acid	213.186	213.186	[M-H]-	159.43	0.0608276	0.000381532	fatty acid
Sinapic acid	223.061	223.061	[M-H]-	148.27	0.07	0.000472112
Resveratrol	227.071	227.071	[M-H]-	157.413	0.0057735	3.66773e-05
Myristic acid	227.201	227.201	[M-H]-	162.69	0.1	0.000614666	fatty acid
3'-Hydroxyflavone	475.117	237.054	[2M-H]-	218.497	0.574224	0.00262807
3'-Hydroxyflavone	237.055	237.055	[M-H]-	154.887	0.410528	0.00265051	Monohydroxyflavone
3-Hydroxyflavone	237.055	237.055	[M-H]-	152.04	0.284781	0.00187306	Monohydroxyflavone
6-Hydroxyflavone	475.119	237.056	[2M-H]-	239.79	0.0556776	0.000232193
7-Hydroxyflavone	475.119	237.056	[2M-H]-	228.173	0.38527	0.0016885
4'-Hydroxyflavone	237.056	237.056	[M-H]-	151.91	0.13	0.00085577	Monohydroxyflavone
7-Hydroxyflavone	237.056	237.056	[M-H]-	153.67	0.0556776	0.00036232	Monohydroxyflavone
6-Hydroxyflavone	237.056	237.056	[M-H]-	155.917	0.146401	0.000938971	Monohydroxyflavone
5-Hydroxyflavone	237.056	237.056	[M-H]-	156.003	0.142945	0.000916296	Monohydroxyflavone
2'-Hydroxyflavone	237.057	237.057	[M-H]-	149.953	0.115902	0.000772922	Monohydroxyflavone
6-Hydroxyflavanone	479.151	239.071	[2M-H]-	244.537	0.111505	0.000455984
2',4'-Dihydroxychalcone	239.072	239.072	[M-H]-	158.573	0.135031	0.000851536
6-Hydroxyflavanone	239.072	239.072	[M-H]-	156.92	0.151327	0.000964361
Pentadecanoic acid		241.216	dimer, adduct	246.47	0.431393	0.00175029	fatty acid
Pentadecanoic acid	241.217	241.217	[M-H]-	166.427	0.15308	0.000919802	fatty acid
3',4'-Dihydroxyflavone	253.049	253.049	[M-H]-	155.15	0.20664	0.00133187	Dihydroxyflavone
3',4'-Dihydroxyflavone	507.108	253.05	[2M-H]-	235.96	0.0360555	0.000152803
Daidzein	507.109	253.05	[2M-H]-	246.33	0.196723	0.000798616
Daidzein	253.05	253.05	[M-H]-	157.585	0.00707107	4.48715e-05	Dihydroxyflavone
Chrysin	507.109	253.05	[2M-H]-	230.51	0.245561	0.00106529
Chrysin	253.051	253.051	[M-H]-	156.14	0.1	0.000640451	Dihydroxyflavone
7,4'-dihydroxyflavone	507.11	253.051	[2M-H]-	221.313	0.0378594	0.000171067
7,4'-dihydroxyflavone	253.051	253.051	[M-H]-	157.007	0.161658	0.00102963	Dihydroxyflavone
2'-Hydroxy-4-methoxychalcone	253.087	253.087	[M-H]-	164.38	0.0458258	0.000278779
2'-Hydroxy-4'-methoxychalcone	253.087	253.087	[M-H]-	163.913	0.0550757	0.000336005
7-Methoxyflavanone	253.088	253.088	[M-H]-	163.707	0.0251661	0.000153727
Isoliquiritigenin	255.066	255.066	[M-H]-	159.373	0.0321455	0.000201699	Dihydroxyflavanone
Liquiritigenin	511.14	255.066	[2M-H]-	202.54	0.0818535	0.000404135
Liquiritigenin	255.066	255.066	[M-H]-	159.28	0.0754983	0.000473998	Dihydroxyflavanone
Liquiritigenin		255.066	dimer adduct	215.08	0.115326	0.000536199
Demethyl medicarpin	255.066	255.066	[M-H]-	161.893	0.172143	0.00106331	Dihydroxyflavanone/Dihydroxypterocarpan
5,8-Dihydroxyflavanone	255.066	255.066	[M-H]-	158.38	0.01	6.31393e-05	Dihydroxyflavanone
Palmitic acid	255.233	255.233	[M-H]-	170.367	0.162583	0.000954314	fatty acid
7,3',4'-TRIHYDROXYISOFLAVONE		267.029	[2M-5H]-	248.673	0.191398	0.000769678
7,3',4'-TRIHYDROXYISOFLAVONE	264.006	267.029	[M-3H]-	156.673	0.240069	0.00153229
3',4',7-Trihydroxyisoflavone		267.03	[2M-5H]-	246.263	0.223681	0.000908301
3',4',7-Trihydroxyisoflavone	264.006	267.03	[M-3H]-	155.917	0.0665833	0.000427044
Coumestrol	535.068	267.03	[2M-H]-	245.05	0.434856	0.00177456
Baicalein	264.007	267.03	[M-3H]-	158.42	0.155242	0.000979938
Coumestrol	267.03	267.03	[M-H]-	155.75	0.0424264	0.000272401
7-Methoxy-4'-hydroxyflavone	267.065	267.065	[M-H]-	164.31	0.306431	0.00186496	hydroxy-methoxyflavone
Pratol	535.139	267.066	[2M-H]-	234	0.0556776	0.000237939
7-Hydroxy-3'-methoxyflavone	535.14	267.066	[2M-H]-	229.623	0.166533	0.000725245
7-Hydroxy-3'-methoxyflavone	267.066	267.066	[M-H]-	165.217	0.112398	0.000680307	hydroxy-methoxyflavone
Formononetin	535.141	267.067	[2M-H]-	257.463	0.312623	0.00121424
Ononin (Formononetin 7-O-glucoside)		267.067	aglycone	163.477	0.0907377	0.00055505
7-Hydroxy-4'-methoxyflavone	535.141	267.067	[2M-H]-	231.777	0.337095	0.0014544
Formononetin	267.067	267.067	[M-H]-	163.763	0.320364	0.00195626	hydroxy-methoxyflavone
Ononin (Formononetin 7-O-glucoside)	312.064	267.067	[M-H+HCO2H]-	223.35	0.14	0.000626819
Ononin (Formononetin 7-O-glucoside)		267.067	MAJOR PEAK, aglycone, FA adduct, M-H	228.237	0.0378594	0.000165878
7-Methoxy-4'-hydroxyflavone	535.141	267.067	[2M-H]-	257.823	0.338575	0.00131321
7-Hydroxy-4'-methoxyflavone	267.067	267.067	[M-H]-	165.03	0.0848528	0.000514166	hydroxy-methoxyflavone
7-hydroxy 3(4- methoxyphenyl) coumarin	267.067	267.067	[M-H]-	162.793	0.250067	0.0015361	hydroxy-methoxyflavone
7,3',4'-TRIHYDROXYISOFLAVONE	269.044	269.044	[M-H]-	162.607	0.207445	0.00127575	Trihydroxyflavone
6,7,4'-Trihydroxyisoflavone	539.098	269.045	[2M-H]-	249.427	0.366924	0.00147107
Genistein	539.098	269.045	[2M-H]-	249.933	0.159478	0.000638083
5,3',4'-Trihydroxyflavone	269.045	269.045	[M-H]-	156.397	0.185023	0.00118303	Trihydroxyflavone
5,3',4'-Trihydroxyflavone	539.098	269.045	[2M-H]-	244.46	0.104403	0.000427076
Apigenin	539.098	269.045	[2M-H]-	238.723	0.120139	0.000503255
3',4',7-Trihydroxyisoflavone	539.098	269.045	[2M-H]-	217.697	0.206478	0.000948468
Genistein	269.045	269.045	[M-H]-	159.89	0.254558	0.00159208	Trihydroxyflavone
6,7,4'-Trihydroxyisoflavone	269.045	269.045	[M-H]-	159.485	0.162635	0.00101975	Trihydroxyflavone
3',4',7-Trihydroxyisoflavone	269.046	269.046	[M-H]-	161.78	0.0264575	0.00016354	Trihydroxyflavone
galangin	539.099	269.046	[2M-H]-	238.003	0.120968	0.000508263
Genistin		269.046	[M-C6H12O6]-	159.49	0.36428	0.00228403
galangin	269.046	269.046	[M-H]-	156.933	0.107858	0.000687285	Trihydroxyflavone
Apigenin	269.046	269.046	[M-H]-	157.475	0.148492	0.000942959	Trihydroxyflavone
8-Hydroxy-5-methoxyflavanone		269.082	dimer	231.29	0.104403	0.000451395
8-Hydroxy-5-methoxyflavanone	269.082	269.082	[M-H]-	165.83	0.052915	0.000319092
Heptadecanoic acid	539.505	269.248	[2M-H]-	259.04	0.543691	0.00209887	fatty acid
Heptadecanoic acid	269.249	269.249	[M-H]-	174.453	0.0208167	0.000119325	fatty acid
Naringenin		271.061	[M-H+146]-, [2M-H]-	206	0.052915	0.000256869
Naringenin	271.061	271.061	[M-H]-	163.01	0.160935	0.000987269
7-Methoxyflavanone		271.098	[M-H+H2O]-	167.373	0.0208167	0.000124373
Pseudoaptigenin	563.099	281.045	[2M-H]-	259.513	0.011547	4.44948e-05
Pseudoaptigenin	281.046	281.046	[M-H]-	164.695	0.176777	0.00107336
Scutellarein	283.025	283.025	[M-3H]-	156.367	0.571343	0.00365387
Scutellarein-7-glucuronide	280.001	283.025	[M-3H]-	202.763	0.544457	0.00268518
3,6,2',3'-Tetrahydroxyflavone	280.001	283.025	[M-3H]-	161.127	0.165025	0.0010242
scutellarin (Scutellarein-7-glucuronide)		283.025	aglycone	164.2	0.301164	0.00183413
scutellarin (Scutellarein-7-glucuronide)	280.001	283.025	[M-3H]-	206.587	0.0737111	0.000356805
Fisetin	280.002	283.025	[M-3H]-	157.483	0.0650641	0.000413149
Sorbifolin		283.025	[M-3+18.0]-,[M-3-14.0]-	175.753	0.387857	0.00220683
Biochanin A (5,7-Dihydroxy-4'-methoxyisoflavone)	567.13	283.061	[2M-H]-	261.037	0.314696	0.00120556
Prunetin	567.13	283.061	[2M-H]-	264.093	0.0896289	0.000339383
Biochanin A (5,7-Dihydroxy-4'-methoxyisoflavone)	283.061	283.061	[M-H]-	166.11	0.0707107	0.000425686	Dihydroxy-methoxyflavone
Prunetin	283.061	283.061	[M-H]-	167.785	0.00707107	4.21436e-05	Dihydroxy-methoxyflavone
Glycitein	283.061	283.061	[M-H]-	166.867	0.126623	0.000758826	Dihydroxy-methoxyflavone
5,7-Dihydroxy-2'-methoxyflavone	567.13	283.061	[2M-H]-	238.493	0.231157	0.000969237
5,7-Dihydroxy-2'-methoxyflavone	283.061	283.061	[M-H]-	167.34	0.07	0.00041831	Dihydroxy-methoxyflavone
Stearic acid	283.264	283.264	[M-H]-	178.537	0.0152753	8.55581e-05	fatty acid
Sorbifolin		284.033	[M-16.0]-	156.797	0.051316	0.000327277
3,6,2',3'-Tetrahydroxyflavone	285.038	285.038	[M-H]-	160.69	0.0953939	0.000593652	tetrahydroxyflavone
Luteolin	571.088	285.04	[2M-H]-	234.867	0.189297	0.000805976
6,7,3',4'-Tetrahydroxyflavanone	282.017	285.04	[M-3H]-	161.633	0.381357	0.0023594
6,7,3',4'-Tetrahydroxyflavanone	282.017	285.04	[M-3H]-	162.2	0.345109	0.00212767
6,7,3',4'-Tetrahydroxyflavanone		285.04	[2M-3H]-	225.39	0.491223	0.00217944
6,7,3',4'-Tetrahydroxyflavanone		285.04	[2M-5H]-	239.28	0.752861	0.00314636
3',4',7,8-tetrahydroxy flavanone rep3		285.04	[2M-3H]-	226.607	0.217332	0.000959073
Luteolin	285.04	285.04	[M-H]-	160.687	0.181475	0.00112937	tetrahydroxyflavone
3,6,2',3'-Tetrahydroxyflavone	285.04	285.04	[M-H]-	162.703	0.187705	0.00115367	tetrahydroxyflavone
3,7,3',4'-Tetrahydroxyflavanone (fustin)		285.04	[2M-3H]-	230.863	0.080829	0.000350116
Kaempferol	571.089	285.041	[2M-H]-	234.797	0.142244	0.000605817
3,7,3',4'-Tetrahydroxyflavanone (fustin)	282.017	285.041	[M-3H]-	160.217	0.110604	0.000690343
3,7,3',4'-Tetrahydroxyflavanone (fustin)		285.041	[2M-5H]-	251.017	0.162583	0.000647699
7,3',4',5'-Tetrahydroxyflavone	285.041	285.041	[M-H]-	161.92	0.0424264	0.000262021	tetrahydroxyflavone
Kaempferol	285.041	285.041	[M-H]-	161.08	0.1253	0.000777872	tetrahydroxyflavone
Fisetin	285.041	285.041	[M-H]-	162.38	0.0173205	0.000106667	tetrahydroxyflavone
3,6,2',4'-Tetrahydroxyflavone	285.041	285.041	[M-H]-	161.993	0.0635085	0.000392044	tetrahydroxyflavone
3',4',7,8-tetrahydroxy flavanone rep3	282.017	285.041	[M-3H]-	162.23	0.08544	0.00052666
Scutellarein	285.041	285.041	[M-H]-	159.523	0.352326	0.00220861	tetrahydroxyflavone
Isosakuranetin	285.075	285.075	[M-H]-	169.637	0.210079	0.00123841
sakuranetin	285.076	285.076	[M-H]-	168.543	0.270062	0.00160233
5,7-Dihydroxy-4'-methoxyflavone	285.077	285.077	[M-H]-	170.873	0.102632	0.000600632
5,7-Dihydroxy-4'-methoxyflavone		285.077	[M-H]- using [M-3]- EIM	171.997	0.170392	0.000990669
5,7-Dihydroxy-4'-methoxyflavone	282.053	285.077	[M-3H]-	165.193	0.130512	0.000790055
Isosakuranin		285.077	[M-H-162]-	168.623	0.085049	0.000504373
Dihydrokaempferol	575.119	287.056	[2M-H]-	248.743	0.0378594	0.000152203
Eriodictyol	287.056	287.056	[M-H]-	165.97	0.108167	0.000651723
Dihydrokaempferol	287.056	287.056	[M-H]-	164.027	0.160104	0.000976086	Tetrahydroxyflavanone
Dihydrokaempferol		287.056	[M-H-27.99]-	158.55	0.167033	0.0010535
3,7,3',4'-Tetrahydroxyflavanone (fustin)	287.056	287.056	[M-H]-	154.573	0.120139	0.000777229	Tetrahydroxyflavanone
Dihydrokaempferol	355.043	287.056	[M-H+Na+HCO2H]-	186.437	0.20108	0.00107855
6,7,3',4'-Tetrahydroxyflavanone	287.056	287.056	[M-H]-	167.527	0.272274	0.00162526	Tetrahydroxyflavanone
3',4',7,8-tetrahydroxy flavanone rep3	287.056	287.056	[M-H]-	164.783	0.107858	0.000654544	Tetrahydroxyflavanone
Catechin	289.071	289.071	[M-H]-	156.673	0.185831	0.00118611
(+)-Catechin	289.072	289.072	[M-H]-	157.43	0.0953939	0.000605945
n-Octyl-beta-D-glucopyranoside	291.181	291.181	[M-H]-	181.297	0.15308	0.000844359
3(3',4'-Dimethoxyphenyl)-7-hydroxycoumarin	595.162	297.077	[2M-H]-	276.723	0.46694	0.00168739
3(3',4'-Dimethoxyphenyl)-7-hydroxycoumarin	297.077	297.077	[M-H]-	172.017	0.165025	0.000959356
3,7,3',4',5'-Pentrahydroxyflavone (robinetin)	295.996	299.02	[M-3H]-	160.55	0.0953939	0.00059417
Kaempferide		299.055	[2M-3H] unknown adduct	240.157	0.37072	0.00154366
Kaempferide	299.056	299.056	[M-H]-	167.037	0.262742	0.00157296
Diosmetin		299.056	[2M+H]-	236.947	0.241109	0.00101756
Diosmetin	299.056	299.056	[M-H]-	171.28	0.195192	0.00113961
Hispidulin	299.056	299.056	[M-H]-	165.52	0.17	0.00102707
Sorbifolin	299.056	299.056	[M-H]-	166.283	0.235018	0.00141336
Hispidulin		299.056	adduct	187.887	0.308275	0.00164075
5-Hydroxy-3',4'-dimethoxyflavanone		299.092	dimer	242.25	0.379868	0.00156808
5-Hydroxy-3',4'-dimethoxyflavanone	299.092	299.092	[M-H]-	174.21	0.20664	0.00118615
5,7-DIMETHOXY-4'-HYDROXYFLAVANONE	299.092	299.092	[M-H]-	174.103	0.306649	0.0017613
7,4'-Dimethoxy-5-hydroxyflavanone	299.093	299.093	[M-H]-	175.547	0.287112	0.00163553
7,4'-Dimethoxy-5-hydroxyflavanone		299.093	dimer	247.013	0.60086	0.0024325
Farrerol	299.093	299.093	[M-H]-	172.283	0.215484	0.00125075
Farrerol	367.081	299.093	[M-H+Na+HCO2H]-	186.6	0.357631	0.00191657
5-Hydroxy-3',4'-dimethoxyflavanone	367.081	299.094	[M-H+Na+HCO2H]-	187.647	0.612726	0.00326532
3,6,2',3'-Tetrahydroxyflavone		301.035	[M-H+16]-	164.907	0.200083	0.00121331
3,7,3',4',5'-Pentrahydroxyflavone (robinetin)	301.036	301.036	[M-H]-	164.547	0.204042	0.00124003
kaempferol-7-O-glucoside		301.036	aglycone	188.973	0.185023	0.000979093
3,7,3',4',5'-Pentrahydroxyflavone (robinetin)		301.036	dimer	228.053	0.372201	0.00163208
Homoeriodictyol		301.071	dimer #2	230.1	0.0866025	0.000376369
Homoeriodictyol	301.072	301.072	[M-H]-	168.623	0.0750555	0.000445108
Hesperetin	603.151	301.072	[2M-H]-	219.763	0.281129	0.00127923
Hesperetin	301.072	301.072	[M-H]-	172.787	0.225019	0.00130229
Homoeriodictyol		301.072	dimer	225.683	0.0635085	0.000281405
Homoeriodictyol	369.06	301.072	[M-H+Na+HCO2H]-	188.053	0.0404145	0.00021491
5,8-Dimethoxyflavanone		301.108	[M-H+H2O]-	172.683	0.128582	0.000744612
Dihydroquercetin (Taxifolin) same as below	607.11	303.051	[2M-H]-	219.897	0.867256	0.00394393
Dihydroquercetin (Taxifolin) same as below	303.051	303.051	[M-H]-	164.38	0.398372	0.00242348
3-Hydroxyflavone	373.03	305.043	[M-H+Na+HCO2H]-	172.343	0.357258	0.00207294
5-Hydroxyflavone	373.031	305.043	[M-H+Na+HCO2H]-	173.98	0.311929	0.0017929
3',4'-Dimethoxy-7-hydroxyflavanone	311.093	311.093	[M-H]-	180.723	0.0665833	0.000368427
3',4'-Dimethoxy-7-hydroxyflavanone	623.193	311.093	[2M-H]-	241.377	0.0351188	0.000145494
5,6-dihydroxy-3',4'-dimethoxy-flavanone	310.049	313.072	[M-3H]-	179.113	0.0776745	0.000433661
4-Hydroxy-2',4',6'-trimethoxychalcone (flavokawain A)	313.108	313.108	[M-H]-	182.417	0.24173	0.00132515
4-Hydroxy-2',4',6'-trimethoxychalcone (flavokawain A)		313.111	adduct, picked manually	204.17	0.506853	0.0024825
5,7-dihydroxy-3',4'-dimethoxy-flavanone	631.183	315.087	[2M-H]-	238.03	0.50319	0.00211398
5,6-dihydroxy-3',4'-dimethoxy-flavanone	315.088	315.088	[M-H]-	176.557	0.175024	0.000991318
5,7-dihydroxy-3',4'-dimethoxy-flavanone	383.075	315.088	[M-H+Na+HCO2H]-	195.74	0.19	0.000970675
5,6-dihydroxy-3',4'-dimethoxy-flavanone	383.075	315.088	[M-H+Na+HCO2H]-	192.043	0.12741	0.000663445
5,7-dihydroxy-3',4'-dimethoxy-flavanone	315.088	315.088	[M-H]-	175.947	0.100167	0.000569301
n-Decyl-beta-D-glucopyranoside	319.212	319.212	[M-H]-	189.387	0.389401	0.00205612
n-Decyl-beta-D-glucopyranoside	639.433	319.212	[2M-H]-	277.923	0.318957	0.00114764
isobavachin	323.129	323.129	[M-H]-	181.427	0.445459	0.00245531
isobavachin	647.266	323.129	[2M-H]-	237.66	0.459021	0.00193142
isobavachin	323.13	323.13	[M-H]-	188.92	0.501099	0.00265244
n-Octyl-beta-D-glucopyranoside	382.184	337.187	[M-H+HCO2H]-	190.017	0.196044	0.00103172
7-Methoxyflavanone		339.085	[M-H+H2O+HCO2H]-	187.12	0.034641	0.000185127
6-prenylnaringenin	339.123	339.123	[M-H]-	183.64	0.614898	0.00334839
6-prenylnaringenin		339.123	opened ring [M-H]-	188.173	0.427239	0.00227046
Desmethylxanthohumol	339.123	339.123	[M-H]-	183.447	0.147422	0.000803625
6-prenylnaringenin	679.255	339.124	[2M-H]-	235.033	0.425245	0.0018093
8-prenylnaringenin		339.124	opened ring [M-H]-	188.3	0.56205	0.00298486
Desmethylxanthohumol		339.124	adduct	187.993	0.289885	0.001542
8-prenylnaringenin	339.124	339.124	[M-H]-	183.543	0.315647	0.00171974
Eupatilin	343.082	343.082	[M-H]-	185.44	0.182483	0.000984053
nevadensin	411.07	343.082	[M-H+Na+HCO2H]-	199.453	0.0907377	0.000454932
nevadensin	343.082	343.082	[M-H]-	182.82	0.122882	0.000672148
Eupatilin	411.07	343.082	[M-H+Na+HCO2H]-	201.777	0.152753	0.000757038
S-Benzyl-N-carbobenzyloxy-L-cysteine	344.096	344.096	[M-H]-	264.843	0.641275	0.00242134
Cohumulone	347.187	347.187	[M-H]-	184.13	0.173494	0.000942234
Glycitein	419.036	351.048	[M-H+Na+HCO2H]-	184.687	0.235443	0.00127482
Chlorogenic acid		351.072	dimer [M-3, M-H] combination	254.473	0.651178	0.00255893
Chlorogenic acid		351.072	dimer [M-3]	259.437	0.611583	0.00235735
Chlorogenic acid	348.049	351.072	[M-3H]-	187.023	0.443772	0.00237281
3,6,2',4'-Tetrahydroxyflavone		353.028	[M-H+Na+HCO2H]-	183.333	0.0503322	0.000274539
Xanthohumol from hop (≥96% HPLC)	353.139	353.139	[M-H]-	196.497	0.26727	0.00136018
Corymbosin	357.098	357.098	[M-H]-	190.833	0.344287	0.00180412
5,7,4'-trihydroxy-6,3',5'-trimethoxyflavone		359.077	[M-H]-,[M-16]-	183.587	0.170098	0.000926527
5,7,4'-trihydroxy-6,3',5'-trimethoxyflavone	359.077	359.077	[M-H]-	183.587	0.170098	0.000926527
5,7,4'-trihydroxy-6,3',5'-trimethoxyflavone		359.077	[M-H+31.9]-	189.377	0.100167	0.000528928
5,7,4'-trihydroxy-6,3',5'-trimethoxyflavone	427.065	359.077	[M-H+Na+HCO2H]-	202.323	0.315647	0.00156011
5,7,4'-trihydroxy-6,3',5'-trimethoxyflavone		359.077	[M-H+31.9]-	189.377	0.100167	0.000528928
5,7,4'-trihydroxy-6,3',5'-trimethoxyflavone	427.065	359.077	[M-H+Na+HCO2H]-	202.323	0.315647	0.00156011
Isohumulone	361.166	361.166	[M-H]-	187.143	0.208407	0.00111362
Humulone		361.2	adduct	206.03	0.7496	0.0036383
Humulone	361.202	361.202	[M-H]-	188.57	0.35	0.00185607
n-Decyl-beta-D-glucopyranoside	410.216	365.218	[M-H+HCO2H]-	198.213	0.312143	0.00157478
7,4'-Dimethoxy-5-hydroxyflavanone	435.068	367.081	[M-H+Na+HCO2H]-	194.46	0.468722	0.00241038
Hymenoxin	373.093	373.093	[M-H]-	190.477	0.090185	0.00047347
Hymenoxin	441.081	373.093	[M-H+Na+HCO2H]-	207.1	0.278388	0.00134422
Gardenin E		374.064	[M-16.0]-	185.313	0.0776745	0.000419152
scaposin	457.075	389.087	[M-H+Na+HCO2H]-	209.407	0.258134	0.00123269
Gardenin E	389.087	389.087	[M-H]-	191.777	0.140119	0.000730636
scaposin		389.087	dimer	263.01	0.360139	0.0013693
Gardenin E	779.183	389.088	[2M-H]-	264.81	0.432666	0.00163387
Gardenin E	457.075	389.088	[M-H+Na+HCO2H]-	209.253	0.17673	0.000844572
scaposin	389.088	389.088	[M-H]-	193.543	0.183394	0.00094756
6,8-diprenylnaringenin	407.186	407.186	[M-H]-	206.727	0.656531	0.00317584
6-geranylnaringenin		407.186	Adduct dimer combination	283.103	0.629312	0.0022229
6-geranylnaringenin	407.187	407.187	[M-H]-	204.763	0.15695	0.000766495
6-geranylnaringenin	815.382	407.187	[2M-H]-	275.873	0.172143	0.000623994
Lupulone	413.27	413.27	[M-H]-	201.757	0.697878	0.00345901
5-Hydroxyferulic acid		417.082	[2M-3H]-	201.65	0.268514	0.00133159
Genistin	476.096	431.098	[M-H+HCO2H]-	220.373	0.15308	0.000694637
Genistin	431.098	431.098	[M-H]-	212.143	0.0757188	0.000356923
Apigenin-7-O-glucoside (apigetrin)	431.098	431.098	[M-H]-	206.74	0.145258	0.000702614
Apigenin-7-O-glucoside (apigetrin)	499.086	431.098	[M-H+Na+HCO2H]-	228.65	0.32187	0.0014077
Apigenin-7-O-glucoside (apigetrin)		431.098	dimer	279.497	0.726659	0.00259988
Artocarpin	435.182	435.182	[M-H]-	218.58	0.225389	0.00103115
Artocarpin	503.169	435.182	[M-H+Na+HCO2H]-	229.533	0.638148	0.0027802
Sinapic acid		445.114	dimer, trimer	261.49	0.482804	0.00184636
Quercitrin	515.079	447.091	[M-H+Na+HCO2H]-	205.517	0.421228	0.00204961
Quercitrin	447.092	447.092	[M-H]-	195.837	0.0378594	0.000193321
Quercitrin		447.093	[2M+H]-	283.197	0.614925	0.00217137
kaempferol-7-O-glucoside	447.093	447.093	[M-H]-	209.167	0.136504	0.000652609
kaempferol-3-O-glucoside	895.194	447.093	[2M-H]-	279.927	1.18938	0.00424891
kaempferol-7-O-glucoside	895.194	447.093	[2M-H]-	283.757	0.750822	0.00264601
kaempferol-3-O-glucoside	447.093	447.093	[M-H]-	200.443	0.325781	0.0016253
kaempferol-3-O-glucoside	515.081	447.094	[M-H+Na+HCO2H]-	222.09	0.649692	0.00292536
Isosakuranin	447.129	447.129	[M-H]-	217.58	0.10583	0.000486396
Isosakuranin	492.127	447.129	[M-H+HCO2H]-	213.68	0.13	0.000608386
Aspalathin		449.108	[M-3]- adduct	204.143	0.218251	0.0010691
Aspalathin	448.1	451.123	[M-3H]-	195.167	0.100664	0.000515787
Aspalathin	451.123	451.123	[M-H]-	194.213	0.218251	0.00112377
Aspalathin	903.255	451.124	[2M-H]-	274.033	0.72148	0.00263282
Aspalathin		451.124	dimer	276.473	0.0305505	0.000110501
Oleanolic acid	523.339	455.351	[M-H+Na+HCO2H]-	231.677	0.0907377	0.000391657
Ursolic acid	523.34	455.353	[M-H+Na+HCO2H]-	229.457	0.983582	0.00428657
Oleanolic acid	455.353	455.353	[M-H]-	219.94	0.226495	0.0010298
Oleanolic acid		455.353	adducts	219.843	0.0723418	0.000329061
Ursolic acid	455.353	455.353	[M-H]-	218.027	0.74009	0.00339449
Boswellic acid, alpha-	455.353	455.353	[M-H]-	222.313	0.390171	0.00175505
Boswellic acid, alpha-	523.341	455.354	[M-H+Na+HCO2H]-	239.787	0.205508	0.000857043
Glycyrrhetinic acid, 18 beta	469.333	469.333	[M-H]-	223.517	0.355012	0.0015883
Pygenic acid A	471.347	471.347	[M-H]-	220.897	0.381357	0.00172641
Hederagenin	471.348	471.348	[M-H]-	222.467	0.517912	0.00232805
Corosolic acid	471.348	471.348	[M-H]-	220.34	0.396106	0.0017977
Pygenic acid A		471.348	Na FA adduct of some kind	232.023	0.372066	0.00160357
Corosolic acid	539.336	471.349	[M-H+Na+HCO2H]-	231.547	0.397157	0.00171523
Hederagenin	539.336	471.349	[M-H+Na+HCO2H]-	234.04	0.568243	0.00242797
soyasapogenol A		473.282	[M-H]- wrong RT	228.57	0.05	0.000218751
silychristin		481.113	MAJOR PEAK, group of adducts (low intensities)	218.2	0.115326	0.000528532
silychristin	481.114	481.114	[M-H]-	201.627	0.238607	0.00118341
bayogenin	487.342	487.342	[M-H]-	225.09	0.238118	0.00105788
bayogenin		487.342	adducts	225.113	0.238607	0.00105994
Asiatic acid		487.342	adduct	232.5	0.643661	0.00276844
Asiatic acid	487.343	487.343	[M-H]-	222.653	0.349619	0.00157024
Pygenic acid B		487.343	[M-H+Na+HCO2H]- late LC	233.213	0.0404145	0.000173294
Pygenic acid B	487.343	487.343	[M-H]-	225.457	0.316596	0.00140425
bayogenin		487.343	adducts	234.767	0.330202	0.00140651
bayogenin	532.341	487.343	[M-H+HCO2H]-	234.733	0.270247	0.00115129
Isosakuranin		493.135	dimer/adduct	290.86	0.408534	0.00140457
medicagenic acid	501.322	501.322	[M-H]-	226.233	0.273191	0.00120756
Pygenic acid C	503.337	503.337	[M-H]-	224.097	0.598777	0.00267196
Madecassic acid		503.337	[M-H+Na+H2CO2]-, [M-H+H2CO2]-,	233.003	0.560387	0.00240506
Pygenic acid C	548.335	503.337	[M-H+HCO2H]-	232.203	0.5058	0.00217826
Madecassic acid	503.337	503.337	[M-H]-	223.913	0.247857	0.00110693
kaempferol-7-O-glucoside	583.068	515.08	[M-H+Na+HCO2H]-	230.037	0.300389	0.00130583
soyasapogenol A	564.366	519.369	[M-H+HCO2H]-	213.323	0.308599	0.00144663
soyasapogenol A	564.366	519.369	[M-H+HCO2H]-	235.997	0.225019	0.000953482
Oleanolic acid		523.339	adducts	235.14	0.362905	0.00154336
Glycyrrhetinic acid, 18 beta	605.31	537.322	[M-H+Na+HCO2H]-	238.05	2.79587	0.0117449
bayogenin		555.329	adducts	239.977	0.273922	0.00114145
apiin	563.14	563.14	[M-H]-	223.957	0.257941	0.00115174
apiin		563.14	-2 charged dimer separated?	215.383	0.188768	0.000876428
apiin		563.14	adduct	228.767	0.0873689	0.000381913
Luteolin		569.073	[2M-3H]-	225.743	0.236925	0.00104953
medicagenic acid	637.295	569.308	[M-H+Na+HCO2H]-	243.473	0.0814453	0.000334514
3',4',7,8-tetrahydroxy flavanone rep3		575.119	[2M-H]-, [2M-3]-	224.107	0.141892	0.000633145
7,4'-Dimethoxy-3-hydroxyflavone	644.85	576.863	[M-H+Na+HCO2H]-	193.67	0.147986	0.000764117
Rhoifolin	645.141	577.154	[M-H+Na+HCO2H]-	229.737	2.29646	0.00999606
Apigenin-7-neohesperidoside (Rhoifolin) same as 56		577.154	minor conformation possibly or double charged adduct dissociates	216.937	0.510131	0.00235152
Isorhoifolin	577.154	577.154	[M-H]-	231.107	0.100664	0.000435576
Rhoifolin	577.155	577.155	[M-H]-	225.59	0.0848528	0.000376137
Isorhoifolin	645.142	577.155	[M-H+Na+HCO2H]-	237.103	0.280416	0.00118268
Apigenin-7-neohesperidoside (Rhoifolin) same as 56	645.143	577.155	[M-H+Na+HCO2H]-	231.393	0.173877	0.000751436
Apigenin-7-neohesperidoside (Rhoifolin) same as 56	645.143	577.155	[M-H+Na+HCO2H]-	231.323	0.968108	0.00418509
Naringin	579.173	579.173	[M-H]-	215.92	0.167033	0.000773587
Naringin	647.16	579.173	[M-H+Na+HCO2H]-	220.787	0.255799	0.00115858
n-Octyl-beta-D-glucopyranoside	583.37	583.37	[2M-H]-	272.833	0.745006	0.00273063
7,3',4',5'-Tetrahydroxyflavone		585.066	dimer	226.743	0.090185	0.00039774
Oleanolic acid		591.327	adducts	241.043	0.378462	0.0015701
Tiliroside		593.129	adduct	228.277	1.10111	0.00482356
Tiliroside	593.129	593.129	[M-H]-	217.09	0.0608276	0.000280195
Saponarin		593.148	[M-H+Na+HCO2H]-,[M-H+Na+HCO2H+Na+HCO2H]-	255.393	0.680612	0.00266496
Saponarin	593.151	593.151	[M-H]-	237.713	0.211266	0.000888743
eriodictyol-7-neohesperidoside	661.138	593.151	[M-H+Na+HCO2H]-	234.56	0.425088	0.00181228
eriodictyol-7-neohesperidoside	592.142	595.166	[M-3H]-	222.523	0.15885	0.000713858
eriodictyol-7-neohesperidoside	595.166	595.166	[M-H]-	222.66	0.0953939	0.000428429
Rutin	604.106	607.129	[M-3H]-	219.553	0.413078	0.00188145
Diosmin	607.166	607.166	[M-H]-	233.823	0.231589	0.000990443
Rutin	609.145	609.145	[M-H]-	231.057	0.198578	0.000859435
Luteolin-7,3'-di-O-glucoside	609.145	609.145	[M-H]-	236.98	0.087178	0.000367871
Neohesperidin		609.181	adduct	236.833	0.219393	0.000926361
Neohesperidin		609.181	adduct	236.81	0.23	0.000971243
Neohesperidin	609.182	609.182	[M-H]-	226.823	0.100664	0.000443801
Hesperidin		609.182	[M-H]-, with Na+FA adduct	230.197	0.16563	0.000719516
Hesperidin		609.183	adduct	240.103	0.737111	0.00306998
neohesperidin dihydrochalcone	611.197	611.197	[M-H]-	232.213	0.349619	0.00150559
bayogenin		623.313	adducts	246.277	0.341516	0.00138672
5-Hydroxyferulic acid		625.121	[3M-5H]-	231.637	0.38527	0.00166325
medicagenic acid		637.296	[M-H+Na+HCO2H+Na+HCO2H]-	249.893	0.621798	0.00248826
Oleanolic acid		659.314	adducts	247.167	0.115036	0.00046542
Diosmin	743.143	675.156	[M-H+Na+HCO2H]-	247.05	0.282135	0.00114201
Neohesperidin		677.17	[M-H+Na+HCO2H]-,[M-H+Na]-	231.333	0.113725	0.000491606
bayogenin		691.308	adducts	252.98	0.721249	0.00285101
nevadensin		709.153	dimer	250.543	0.0472582	0.000188623
Icariin	721.235	721.235	[M-H+HCO2H]-	256.303	1.04639	0.00408263
Cauloside C		765.443	[M-H]2-	454.127	0.602854	0.0013275
Cauloside C	856.446	811.448	[M-H+HCO2H]-	289.873	0.75831	0.002616
Glycyrrhizic acid	821.397	821.397	[M-H]-	279.43	0.384318	0.00137536
3-Glc, 28-Glc medicagenic acid	825.428	825.428	[M-H]-	300.86	0.707602	0.00235193
3-Glc, 28-Glc medicagenic acid		825.428	[M-H+33.9]2-	477.833	0.652482	0.0013655
3-Glc, 28-Glc medicagenic acid		825.428	[M-H]2-	470.32	0.522015	0.00110992
Apigenin-7-neohesperidoside (Rhoifolin) same as 56		866.237	likely double charged monomer	217.643	0.260832	0.00119844

## Sheet: Table S3. M.truncatula Roots
RT [min]	CCS (Å²)	m/z meas.	M meas.	Ions	Name	Molecular Formula	Annotations	AQ	Annotation Source	Boxplot	Mob. 1/K0	Include	Medicago Root rep1_1-F,5_01_2175	Medicago Root rep2_1-F,5_01_2176	Medicago Root rep3_1-F,5_01_2177
7.48	159.7	255.066	256.073	[M-H]-	Liquiritigenin	C15H12O4	Analyte List - Bruker Sumner MetaboBASE Plant Library_Waters_timsTOF CCS Measurements_STOW ET AL 01Nov18	2220	Bruker Sumner MetaboBASE Plant Library_Waters_timsTOF CCS Measurements_STOW ET AL 01Nov18	11551.6	0.757	TRUE	11483	12932	11552
9.99	168.8	301.073	302.08	[M-H]-	Homoeriodictyol	C16H14O6	Analyte List - Bruker Sumner MetaboBASE Plant Library_Waters_timsTOF CCS Measurements_STOW ET AL 01Nov18	2220	Bruker Sumner MetaboBASE Plant Library_Waters_timsTOF CCS Measurements_STOW ET AL 01Nov18	7013.9	0.806	TRUE	6890	7766	7014
12.99	301.5	825.427	826.434	[M-H]-, [M+Cl]-	3-Glu-28-Glu Medicagenic acid (NMR)	C42H66O16	Analyte List - Bruker Sumner MetaboBASE Plant Library_Waters_timsTOF CCS Measurements_STOW ET AL 01Nov18	2220	Bruker Sumner MetaboBASE Plant Library_Waters_timsTOF CCS Measurements_STOW ET AL 01Nov18	461330	1.481	TRUE	461330	443407	473032
7.18	158.4	253.051	254.058	[M-H]-	7,4'-Dihydroxyflavone	C15H10O4	Analyte List - Bruker Sumner MetaboBASE Plant Library_Waters_timsTOF CCS Measurements_STOW ET AL 01Nov18	2220	Bruker Sumner MetaboBASE Plant Library_Waters_timsTOF CCS Measurements_STOW ET AL 01Nov18	13630.6	0.751	TRUE	13930	11934	13631
12.06	164.3	267.066	268.073	[M-H]-	7-Hydroxy-3'-methoxyflavone	C16H12O4	Analyte List - Bruker Sumner MetaboBASE Plant Library_Waters_timsTOF CCS Measurements_STOW ET AL 01Nov18	2220	Bruker Sumner MetaboBASE Plant Library_Waters_timsTOF CCS Measurements_STOW ET AL 01Nov18	53747.5	0.781	TRUE	56302	51196	53748
29.91	166.1	241.217	242.225	[M-H]-	Pentadecanoic acid	C15H30O2	Analyte List - Bruker Sumner MetaboBASE Plant Library_Waters_timsTOF CCS Measurements_STOW ET AL 01Nov18	2210	Bruker Sumner MetaboBASE Plant Library_Waters_timsTOF CCS Measurements_STOW ET AL 01Nov18	1847.25	0.785	TRUE	1847	1808	2031
9.67	156.2	267.03	268.037	[M-H]-	Coumestrol	C15H8O5	Analyte List - Bruker Sumner MetaboBASE Plant Library_Waters_timsTOF CCS Measurements_STOW ET AL 01Nov18	2210	Bruker Sumner MetaboBASE Plant Library_Waters_timsTOF CCS Measurements_STOW ET AL 01Nov18	25982.2	0.742	TRUE	26106	25390	25982
9.31	163.3	271.061	272.068	[M-H]-	Naringenin	C15H12O5	Analyte List - Bruker Sumner MetaboBASE Plant Library_Waters_timsTOF CCS Measurements_STOW ET AL 01Nov18	2210	Bruker Sumner MetaboBASE Plant Library_Waters_timsTOF CCS Measurements_STOW ET AL 01Nov18	5971.1	0.776	TRUE	4957	5971	6065
3.99	238.4	593.15	594.158	[M-H]-	Saponarin	C27H30O15	Analyte List - Bruker Sumner MetaboBASE Plant Library_Waters_timsTOF CCS Measurements_STOW ET AL 01Nov18	2210	Bruker Sumner MetaboBASE Plant Library_Waters_timsTOF CCS Measurements_STOW ET AL 01Nov18	1054.24	1.163	TRUE	1054	1175	958
14.36	205.3	1087.57	1088.58	[M-H]-	3-(Rha(1-2)Glu(1-2)Glu-28-Glu oleanolic acid (NMR)	C54H88O22	Analyte List - Bruker Sumner MetaboBASE Plant Library_Waters_timsTOF CCS Measurements_STOW ET AL 01Nov18	2220	Bruker Sumner MetaboBASE Plant Library_Waters_timsTOF CCS Measurements_STOW ET AL 01Nov18	2277	1.012	TRUE	1486	2277	2400
23.38	240.8	564.33	565.338	[M-H]-	1-(9Z,12Z-Octadecadienoyl-2-hydroxy-sn-glycero-3-phosphocholine (NMR)	C27H52NO9P	Analyte List - Bruker Sumner MetaboBASE Plant Library_Waters_timsTOF CCS Measurements_STOW ET AL 01Nov18	2220	Bruker Sumner MetaboBASE Plant Library_Waters_timsTOF CCS Measurements_STOW ET AL 01Nov18	3949.06	1.174	TRUE	3949	3747	4473
12.73	298	857.453	858.46	[M-H]-	3-Glu-28-Glu-Bayogenin (NMR)	C43H70O17	Analyte List - Bruker Sumner MetaboBASE Plant Library_Waters_timsTOF CCS Measurements_STOW ET AL 01Nov18	2220	Bruker Sumner MetaboBASE Plant Library_Waters_timsTOF CCS Measurements_STOW ET AL 01Nov18	206503	1.464	TRUE	195156	206503	215441
13.55	197.6	809.431	810.439	[M-H]-	Hex-hex-Polygalagenin (PUT)	C42H66O15	Analyte List - Bruker Sumner MetaboBASE Plant Library_Waters_timsTOF CCS Measurements_STOW ET AL 01Nov18	2220	Bruker Sumner MetaboBASE Plant Library_Waters_timsTOF CCS Measurements_STOW ET AL 01Nov18	2248.82	0.97	TRUE	2249	1937	2447
15.67	277	793.436	794.444	[M-H]-, [M+Cl]-	3-GlcA-28-Glc oleanolic acid (NMR)	C42H66O14	Analyte List - Bruker Sumner MetaboBASE Plant Library_Waters_timsTOF CCS Measurements_STOW ET AL 01Nov18	2220	Bruker Sumner MetaboBASE Plant Library_Waters_timsTOF CCS Measurements_STOW ET AL 01Nov18	13772.3	1.359	TRUE	13389	16547	13772
14.72	167	283.061	284.068	[M-H]-	Biochanin A (5,7-dihydroxy-4'-methoxyisoflavone)	C16H12O5	Analyte List - Bruker Sumner MetaboBASE Plant Library_Waters_timsTOF CCS Measurements_STOW ET AL 01Nov18	2210	Bruker Sumner MetaboBASE Plant Library_Waters_timsTOF CCS Measurements_STOW ET AL 01Nov18	1786.47	0.796	TRUE	1916	1786	1189
11.22	160.2	255.066	256.073	[M-H]-	Isoliquiritigenin	C15H12O4	Analyte List - Bruker Sumner MetaboBASE Plant Library_Waters_timsTOF CCS Measurements_STOW ET AL 01Nov18	2210	Bruker Sumner MetaboBASE Plant Library_Waters_timsTOF CCS Measurements_STOW ET AL 01Nov18	24747	0.759	TRUE	22888	24747	25078
22.41	223.3	471.348	472.355	[M-H]-	Hederagenin	C30H48O4	Analyte List - Bruker Sumner MetaboBASE Plant Library_Waters_timsTOF CCS Measurements_STOW ET AL 01Nov18	2210	Bruker Sumner MetaboBASE Plant Library_Waters_timsTOF CCS Measurements_STOW ET AL 01Nov18	2341.33	1.084	TRUE	2606	1924	2341
5.98	160.2	269.045	270.053	[M-H]-	3',4',7-Trihydroxyisoflavone	C15H10O5	Analyte List - Bruker Sumner MetaboBASE Plant Library_Waters_timsTOF CCS Measurements_STOW ET AL 01Nov18	2210	Bruker Sumner MetaboBASE Plant Library_Waters_timsTOF CCS Measurements_STOW ET AL 01Nov18	6500.16	0.761	TRUE	6470	6500	6746
19.19	227.3	501.322	502.329	[M-H]-	Medicagenic acid	C30H46O6	Analyte List - Bruker Sumner MetaboBASE Plant Library_Waters_timsTOF CCS Measurements_STOW ET AL 01Nov18	2210	Bruker Sumner MetaboBASE Plant Library_Waters_timsTOF CCS Measurements_STOW ET AL 01Nov18	13819.9	1.105	TRUE	11281	13820	14415
8.28	167.5	283.06	284.067	[M-H]-	Glycitein	C16H12O5	Analyte List - Bruker Sumner MetaboBASE Plant Library_Waters_timsTOF CCS Measurements_STOW ET AL 01Nov18	2210	Bruker Sumner MetaboBASE Plant Library_Waters_timsTOF CCS Measurements_STOW ET AL 01Nov18	5561.64	0.798	TRUE	6126	4953	5562
7.68	165.6	287.056	288.063	[M-H]-	Eriodictyol	C15H12O6	Analyte List - Bruker Sumner MetaboBASE Plant Library_Waters_timsTOF CCS Measurements_STOW ET AL 01Nov18	2200	Bruker Sumner MetaboBASE Plant Library_Waters_timsTOF CCS Measurements_STOW ET AL 01Nov18	618.517	0.789	TRUE	619	623	471
13.09	175.6	299.092	300.1	[M-H]-	Farrerol	C17H16O5	Analyte List - Bruker Sumner MetaboBASE Plant Library_Waters_timsTOF CCS Measurements_STOW ET AL 01Nov18	2120	Bruker Sumner MetaboBASE Plant Library_Waters_timsTOF CCS Measurements_STOW ET AL 01Nov18	39833.6	0.839	TRUE	37853	39834	40479
7.84	166.6	283.061	284.069	[M-H]-	Glycitein	C16H12O5	Analyte List - Bruker Sumner MetaboBASE Plant Library_Waters_timsTOF CCS Measurements_STOW ET AL 01Nov18	2110	Bruker Sumner MetaboBASE Plant Library_Waters_timsTOF CCS Measurements_STOW ET AL 01Nov18	1623.91	0.794	TRUE	1624	1669	1193
11.92	177	315.087	316.095	[M-H]-	5,6-Dihydroxy-3',4'-dimethoxyflavanone	C17H16O6	Analyte List - Bruker Sumner MetaboBASE Plant Library_Waters_timsTOF CCS Measurements_STOW ET AL 01Nov18	2110	Bruker Sumner MetaboBASE Plant Library_Waters_timsTOF CCS Measurements_STOW ET AL 01Nov18	2653.79	0.847	TRUE	2728	2654	2641
9.62	156.2	267.025	268.032	[M-H]-	Coumestrol	C15H8O5	Analyte List - Bruker Sumner MetaboBASE Plant Library_Waters_timsTOF CCS Measurements_STOW ET AL 01Nov18	1210	Bruker Sumner MetaboBASE Plant Library_Waters_timsTOF CCS Measurements_STOW ET AL 01Nov18	2249.75	0.742	TRUE	2237	2250	3059
23.25	213.7	476.278	477.285	[M-H]-	1-(9Z,12Z-Octadecadienoyl)-2-hydroxy-sn-glycero-3-phosphoethanolamine (NMR)	C23H44NO7P	Analyte List - Bruker Sumner MetaboBASE Plant Library_Waters_timsTOF CCS Measurements_STOW ET AL 01Nov18	2210	Bruker Sumner MetaboBASE Plant Library_Waters_timsTOF CCS Measurements_STOW ET AL 01Nov18	3005.61	1.037	TRUE	2545	3087	3006
12.65	321.5	987.481	988.488	[M-H]-	3-Glu(1-3)Glu-28-Glu Medicagenic acid (NMR)	C48H76O21	Analyte List - Bruker Sumner MetaboBASE Plant Library_Waters_timsTOF CCS Measurements_STOW ET AL 01Nov18	2210	Bruker Sumner MetaboBASE Plant Library_Waters_timsTOF CCS Measurements_STOW ET AL 01Nov18	34635.8	1.583	TRUE	34636	34210	37250
26.83	175.5	271.228	272.235	[M-H]-	3-Hydroxyhexadecanoic acid (NMR)	C16H32O3	Analyte List - Bruker Sumner MetaboBASE Plant Library_Waters_timsTOF CCS Measurements_STOW ET AL 01Nov18	2210	Bruker Sumner MetaboBASE Plant Library_Waters_timsTOF CCS Measurements_STOW ET AL 01Nov18	3963.27	0.834	TRUE	3286	4361	3963
22.65	213.7	476.278	477.286	[M-H]-	1-Hydroxy-2-(9Z,12Z-octadecadienoyl)-sn-glycero-3-phosphoethanolamine (NMR)	C23H44NO7P	Analyte List - Bruker Sumner MetaboBASE Plant Library_Waters_timsTOF CCS Measurements_STOW ET AL 01Nov18	2210	Bruker Sumner MetaboBASE Plant Library_Waters_timsTOF CCS Measurements_STOW ET AL 01Nov18	2281.93	1.037	TRUE	2304	2212	2282
27.61	178.4	297.243	298.251	[M-H]-	(Z)-3-Hydroxyoctadec-7-enoic acid (NMR)	C18H34O3	Analyte List - Bruker Sumner MetaboBASE Plant Library_Waters_timsTOF CCS Measurements_STOW ET AL 01Nov18	2210	Bruker Sumner MetaboBASE Plant Library_Waters_timsTOF CCS Measurements_STOW ET AL 01Nov18	1019.19	0.851	TRUE	1189	1019	984
20.18	265	647.38	648.388	[M-H]-, [M+Cl]-	HexA-Hederagenin (PUT)	C36H56O10	Analyte List - Bruker Sumner MetaboBASE Plant Library_Waters_timsTOF CCS Measurements_STOW ET AL 01Nov18	2210	Bruker Sumner MetaboBASE Plant Library_Waters_timsTOF CCS Measurements_STOW ET AL 01Nov18	31034.4	1.296	TRUE	29889	34139	31034
22.78	240.4	564.33	565.338	[M-H]-	1-Hydroxy-2-(9Z,12Z,15Z-octadecatrienoyl)-sn-glycero-2-phosphocholine (NMR)	C27H52NO9P	Analyte List - Bruker Sumner MetaboBASE Plant Library_Waters_timsTOF CCS Measurements_STOW ET AL 01Nov18	2210	Bruker Sumner MetaboBASE Plant Library_Waters_timsTOF CCS Measurements_STOW ET AL 01Nov18	2819.02	1.172	TRUE	3084	2819	2413
21.63	239.6	562.315	563.322	[M-H]-	1-(9Z,12Z,15Z-Octadecatrienoyl)-2-hydroxy-sn-glycero-3-phosphocholine (NMR)	C27H50NO9P	Analyte List - Bruker Sumner MetaboBASE Plant Library_Waters_timsTOF CCS Measurements_STOW ET AL 01Nov18	2210	Bruker Sumner MetaboBASE Plant Library_Waters_timsTOF CCS Measurements_STOW ET AL 01Nov18	1167.69	1.168	TRUE	943	1168	1171
20.38	273.7	669.377	634.407	[M+Cl]-, [M-H]-	Hex-Hederagenin (or 2-hydroxyoleanolic acid) (PUT)	C36H58O9	Analyte List - Bruker Sumner MetaboBASE Plant Library_Waters_timsTOF CCS Measurements_STOW ET AL 01Nov18	2210	Bruker Sumner MetaboBASE Plant Library_Waters_timsTOF CCS Measurements_STOW ET AL 01Nov18	12836.5	1.339	TRUE	12837	11567	14672
5.85	229.8	593.152	594.159	[M-H]-	Kaempferol-3-O-rutinoside	C27H30O15	Analyte List - Bruker Sumner MetaboBASE Plant Library_Waters_timsTOF CCS Measurements_STOW ET AL 01Nov18	2210	Bruker Sumner MetaboBASE Plant Library_Waters_timsTOF CCS Measurements_STOW ET AL 01Nov18	749.018	1.121	TRUE	803	749	656
19.07	324.4	1067.54	1068.55	[M-H]-, [M+Cl]-	3-Rha-Gal-GluA-22-DDMP Soyasaponenol B (NMR)	C54H84O21	Analyte List - Bruker Sumner MetaboBASE Plant Library_Waters_timsTOF CCS Measurements_STOW ET AL 01Nov18	2210	Bruker Sumner MetaboBASE Plant Library_Waters_timsTOF CCS Measurements_STOW ET AL 01Nov18	25149.6	1.599	TRUE	18695	25150	26165
9.17	158.9	253.05	254.057	[M-H]-	3',4'-Dihydroxyflavone	C15H10O4	Analyte List - Bruker Sumner MetaboBASE Plant Library_Waters_timsTOF CCS Measurements_STOW ET AL 01Nov18	2210	Bruker Sumner MetaboBASE Plant Library_Waters_timsTOF CCS Measurements_STOW ET AL 01Nov18	2647.64	0.753	TRUE	2481	2756	2648
12.65	187.2	987.48	988.487	[M-H]-	3-Glu(1-3)Glu-28-Glu Medicagenic acid (NMR)	C48H76O21	Analyte List - Bruker Sumner MetaboBASE Plant Library_Waters_timsTOF CCS Measurements_STOW ET AL 01Nov18	2210	Bruker Sumner MetaboBASE Plant Library_Waters_timsTOF CCS Measurements_STOW ET AL 01Nov18	5536.06	0.922	TRUE	5536	5543	5333
14.61	189.1	927.495	928.502	[M-H]-	3-Glu-(1-2)Ara-28-Glu Hederagenin (NMR)	C47H76O18	Analyte List - Bruker Sumner MetaboBASE Plant Library_Waters_timsTOF CCS Measurements_STOW ET AL 01Nov18	2210	Bruker Sumner MetaboBASE Plant Library_Waters_timsTOF CCS Measurements_STOW ET AL 01Nov18	7902.36	0.93	TRUE	7947	7902	7879
18.39	286.2	801.419	766.45	[M+Cl]-, [M-H]-	Cauloside C (3-Glu(1-2)Ara Hederagenin) (NMR)	C41H66O13	Analyte List - Bruker Sumner MetaboBASE Plant Library_Waters_timsTOF CCS Measurements_STOW ET AL 01Nov18	2210	Bruker Sumner MetaboBASE Plant Library_Waters_timsTOF CCS Measurements_STOW ET AL 01Nov18	47502.1	1.405	TRUE	46509	47502	48776
18.7	313	939.495	940.502	[M-H]-, [M+Cl]-	3-Rha(1-2)Gal(1-2)GluA-Soyasaponenol E (NMR)	C48H76O18	Analyte List - Bruker Sumner MetaboBASE Plant Library_Waters_timsTOF CCS Measurements_STOW ET AL 01Nov18	2210	Bruker Sumner MetaboBASE Plant Library_Waters_timsTOF CCS Measurements_STOW ET AL 01Nov18	258256	1.54	TRUE	258256	264351	256802
14.48	291.1	895.432	896.439	[M-H]-	Hex-hexA-Mal-Hederagenin (PUT)	C45H68O18	Analyte List - Bruker Sumner MetaboBASE Plant Library_Waters_timsTOF CCS Measurements_STOW ET AL 01Nov18	2210	Bruker Sumner MetaboBASE Plant Library_Waters_timsTOF CCS Measurements_STOW ET AL 01Nov18	2666.03	1.431	TRUE	2666	2605	2872
12.74	178.1	857.453	858.46	[M-H]-	3-Glu-28-Glu-Bayogenin (NMR)	C43H70O17	Analyte List - Bruker Sumner MetaboBASE Plant Library_Waters_timsTOF CCS Measurements_STOW ET AL 01Nov18	2210	Bruker Sumner MetaboBASE Plant Library_Waters_timsTOF CCS Measurements_STOW ET AL 01Nov18	5377.2	0.875	TRUE	6011	5377	4925
14.77	278.2	809.432	810.439	[M-H]-	3-GlcA-28-Glc-4-Epi Hederagenin (NMR)	C42H66O15	Analyte List - Bruker Sumner MetaboBASE Plant Library_Waters_timsTOF CCS Measurements_STOW ET AL 01Nov18	2210	Bruker Sumner MetaboBASE Plant Library_Waters_timsTOF CCS Measurements_STOW ET AL 01Nov18	3842.68	1.366	TRUE	3537	3843	4128
14.61	184.4	927.495	928.502	[M-H]-	3-Glu-(1-2)Ara-28-Glu Hederagenin (NMR)	C47H76O18	Analyte List - Bruker Sumner MetaboBASE Plant Library_Waters_timsTOF CCS Measurements_STOW ET AL 01Nov18	2210	Bruker Sumner MetaboBASE Plant Library_Waters_timsTOF CCS Measurements_STOW ET AL 01Nov18	0	0.907	TRUE	0	0	8296
15.36	287.6	841.458	842.465	[M-H]-	Hex-hex Hederagenin (+ formic acid) (PUT)	C43H70O16	Analyte List - Bruker Sumner MetaboBASE Plant Library_Waters_timsTOF CCS Measurements_STOW ET AL 01Nov18	2210	Bruker Sumner MetaboBASE Plant Library_Waters_timsTOF CCS Measurements_STOW ET AL 01Nov18	38066.7	1.413	TRUE	34744	38572	38067
14.95	266.6	663.374	664.381	[M-H]-, [M+Cl]-	Hex-Medicagenic acid (PUT)	C36H56O11	Analyte List - Bruker Sumner MetaboBASE Plant Library_Waters_timsTOF CCS Measurements_STOW ET AL 01Nov18	2210	Bruker Sumner MetaboBASE Plant Library_Waters_timsTOF CCS Measurements_STOW ET AL 01Nov18	7536.37	1.304	TRUE	6335	8142	7536
13.24	288.6	897.448	898.455	[M-H]-	Hex-hex-Mal-Bayogenin (isomer 1) (PUT)	C45H70O18	Analyte List - Bruker Sumner MetaboBASE Plant Library_Waters_timsTOF CCS Measurements_STOW ET AL 01Nov18	2210	Bruker Sumner MetaboBASE Plant Library_Waters_timsTOF CCS Measurements_STOW ET AL 01Nov18	25394.2	1.419	TRUE	22798	25394	27016
14.61	302.5	963.471	928.502	[M+Cl]-	3-Glu-(1-2)Ara-28-Glu Hederagenin (NMR)	C47H76O18	Analyte List - Bruker Sumner MetaboBASE Plant Library_Waters_timsTOF CCS Measurements_STOW ET AL 01Nov18	2210	Bruker Sumner MetaboBASE Plant Library_Waters_timsTOF CCS Measurements_STOW ET AL 01Nov18	13589.7	1.489	TRUE	14890	12015	13590
14.61	300.1	927.495	928.502	[M-H]-	3-Glu-(1-2)Ara-28-Glu Hederagenin (NMR)	C47H76O18	Analyte List - Bruker Sumner MetaboBASE Plant Library_Waters_timsTOF CCS Measurements_STOW ET AL 01Nov18	2210	Bruker Sumner MetaboBASE Plant Library_Waters_timsTOF CCS Measurements_STOW ET AL 01Nov18	6495.73	1.477	TRUE	4829	6496	6519
13.46	305.2	911.427	912.434	[M-H]-	3-(6'-O-Malonyl)-Glu-28-Glu Medicagenic acid (NMR)	C45H68O19	Analyte List - Bruker Sumner MetaboBASE Plant Library_Waters_timsTOF CCS Measurements_STOW ET AL 01Nov18	2210	Bruker Sumner MetaboBASE Plant Library_Waters_timsTOF CCS Measurements_STOW ET AL 01Nov18	134380	1.501	TRUE	134380	135134	123277
3.78	200.9	433.114	434.121	[M-H]-	3-Glu-3,4',7-trihydroxyisoflavanone (NMR)	C21H22O10	Analyte List - Bruker Sumner MetaboBASE Plant Library_Waters_timsTOF CCS Measurements_STOW ET AL 01Nov18	2210	Bruker Sumner MetaboBASE Plant Library_Waters_timsTOF CCS Measurements_STOW ET AL 01Nov18	25855.4	0.972	TRUE	24742	25855	27151
9.4	160.7	269.046	270.053	[M-H]-	Genistein	C15H10O5	Analyte List - Bruker Sumner MetaboBASE Plant Library_Waters_timsTOF CCS Measurements_STOW ET AL 01Nov18	2200	Bruker Sumner MetaboBASE Plant Library_Waters_timsTOF CCS Measurements_STOW ET AL 01Nov18	933.723	0.764	TRUE	934	899	1148
14.77	182.2	343.082	344.089	[M-H]-	Nevadensin	C18H16O7	Analyte List - Bruker Sumner MetaboBASE Plant Library_Waters_timsTOF CCS Measurements_STOW ET AL 01Nov18	2200	Bruker Sumner MetaboBASE Plant Library_Waters_timsTOF CCS Measurements_STOW ET AL 01Nov18	1298.14	0.875	TRUE	1351	976	1298
28.11	163.4	227.201	228.209	[M-H]-	Myristic acid	C14H28O2	Analyte List - Bruker Sumner MetaboBASE Plant Library_Waters_timsTOF CCS Measurements_STOW ET AL 01Nov18	2200	Bruker Sumner MetaboBASE Plant Library_Waters_timsTOF CCS Measurements_STOW ET AL 01Nov18	734.825	0.77	TRUE	735	987	684
23.47	222	471.349	472.356	[M-H]-	Corosolic acid	C30H48O4	Analyte List - Bruker Sumner MetaboBASE Plant Library_Waters_timsTOF CCS Measurements_STOW ET AL 01Nov18	2200	Bruker Sumner MetaboBASE Plant Library_Waters_timsTOF CCS Measurements_STOW ET AL 01Nov18	586.34	1.077	TRUE	841	492	586
14.02	299.9	809.432	810.439	[M-H]-	Hex-hex-Polygalagenin (PUT)	C42H66O15	Analyte List - Bruker Sumner MetaboBASE Plant Library_Waters_timsTOF CCS Measurements_STOW ET AL 01Nov18	2120	Bruker Sumner MetaboBASE Plant Library_Waters_timsTOF CCS Measurements_STOW ET AL 01Nov18	4029.4	1.473	TRUE	4209	3894	4029
15.05	275.2	809.432	810.439	[M-H]-	3-GlcA-28-Glc-4-Epi Hederagenin (NMR)	C42H66O15	Analyte List - Bruker Sumner MetaboBASE Plant Library_Waters_timsTOF CCS Measurements_STOW ET AL 01Nov18	2120	Bruker Sumner MetaboBASE Plant Library_Waters_timsTOF CCS Measurements_STOW ET AL 01Nov18	24648.6	1.351	TRUE	24649	25503	22856
29.99	174.8	279.233	280.24	[M-H]-	9Z,12Z-Linoleic acid (NMR)	C18H32O2	Analyte List - Bruker Sumner MetaboBASE Plant Library_Waters_timsTOF CCS Measurements_STOW ET AL 01Nov18	2120	Bruker Sumner MetaboBASE Plant Library_Waters_timsTOF CCS Measurements_STOW ET AL 01Nov18	27134.6	0.832	TRUE	28726	27135	24631
3.54	235.4	593.151	594.158	[M-H]-	Saponarin	C27H30O15	Analyte List - Bruker Sumner MetaboBASE Plant Library_Waters_timsTOF CCS Measurements_STOW ET AL 01Nov18	2110	Bruker Sumner MetaboBASE Plant Library_Waters_timsTOF CCS Measurements_STOW ET AL 01Nov18	4647.45	1.149	TRUE	4555	4647	4952
7.96	168.8	283.061	284.068	[M-H]-	Glycitein	C16H12O5	Analyte List - Bruker Sumner MetaboBASE Plant Library_Waters_timsTOF CCS Measurements_STOW ET AL 01Nov18	2110	Bruker Sumner MetaboBASE Plant Library_Waters_timsTOF CCS Measurements_STOW ET AL 01Nov18	13039.8	0.804	TRUE	11999	13806	13040
7.58	162	269.045	270.052	[M-H]-	3,7,4'-Trihydroxyflavone (5-Deoxykampferol)	C15H10O5	Analyte List - Bruker Sumner MetaboBASE Plant Library_Waters_timsTOF CCS Measurements_STOW ET AL 01Nov18	2110	Bruker Sumner MetaboBASE Plant Library_Waters_timsTOF CCS Measurements_STOW ET AL 01Nov18	7806.02	0.77	TRUE	8934	6932	7806
8.73	168.8	283.061	284.068	[M-H]-	Glycitein	C16H12O5	Analyte List - Bruker Sumner MetaboBASE Plant Library_Waters_timsTOF CCS Measurements_STOW ET AL 01Nov18	2110	Bruker Sumner MetaboBASE Plant Library_Waters_timsTOF CCS Measurements_STOW ET AL 01Nov18	23718.8	0.804	TRUE	22462	23782	23719
9.17	165.3	299.057	300.064	[M-H]-	Sorbifolin	C16H12O6	Analyte List - Bruker Sumner MetaboBASE Plant Library_Waters_timsTOF CCS Measurements_STOW ET AL 01Nov18	2110	Bruker Sumner MetaboBASE Plant Library_Waters_timsTOF CCS Measurements_STOW ET AL 01Nov18	888.43	0.789	TRUE	888	1106	628
11.51	165.7	281.045	282.052	[M-H]-	Pseudobaptigenin	C16H10O5	Analyte List - Bruker Sumner MetaboBASE Plant Library_Waters_timsTOF CCS Measurements_STOW ET AL 01Nov18	2110	Bruker Sumner MetaboBASE Plant Library_Waters_timsTOF CCS Measurements_STOW ET AL 01Nov18	7450.65	0.789	TRUE	6150	7451	8669
12.63	302.8	825.427	826.434	[M-H]-	3-Glu-28-Glu Medicagenic acid (NMR)	C42H66O16	Analyte List - Bruker Sumner MetaboBASE Plant Library_Waters_timsTOF CCS Measurements_STOW ET AL 01Nov18	2110	Bruker Sumner MetaboBASE Plant Library_Waters_timsTOF CCS Measurements_STOW ET AL 01Nov18	7047.69	1.487	TRUE	8433	6569	7048
11.06	173.8	299.092	300.099	[M-H]-	5,7-Dimethoxy-4'-hydroxyflavanone	C17H16O5	Analyte List - Bruker Sumner MetaboBASE Plant Library_Waters_timsTOF CCS Measurements_STOW ET AL 01Nov18	2100	Bruker Sumner MetaboBASE Plant Library_Waters_timsTOF CCS Measurements_STOW ET AL 01Nov18	484.005	0.83	TRUE	477	559	484
12.78	300.7	825.427	826.434	[M-H]-	3-Glu-28-Glu Medicagenic acid (NMR)	C42H66O16	Analyte List - Bruker Sumner MetaboBASE Plant Library_Waters_timsTOF CCS Measurements_STOW ET AL 01Nov18	2100	Bruker Sumner MetaboBASE Plant Library_Waters_timsTOF CCS Measurements_STOW ET AL 01Nov18	405.792	1.477	TRUE	310	542	406
17.63	298.8	795.451	796.459	[M-H]-, [M+Cl]-	3-Gal(1-2)GluA Soyasapogenol B (NMR)	C42H68O14	Analyte List - Bruker Sumner MetaboBASE Plant Library_Waters_timsTOF CCS Measurements_STOW ET AL 01Nov18	1220	Bruker Sumner MetaboBASE Plant Library_Waters_timsTOF CCS Measurements_STOW ET AL 01Nov18	36655.7	1.466	TRUE	36600	36656	43504
1.01	186.6	137.024	138.032	[M-H]-	Protocatechuic aldehyde	C7H6O3	Analyte List - Bruker Sumner MetaboBASE Plant Library_Waters_timsTOF CCS Measurements_STOW ET AL 01Nov18	2200	Bruker Sumner MetaboBASE Plant Library_Waters_timsTOF CCS Measurements_STOW ET AL 01Nov18	1803.12	0.849	TRUE	1880	1081	1803
17.39	228.6	503.338	504.345	[M-H]-	Pygenic acid C a	C30H48O6	Analyte List - Bruker Sumner MetaboBASE Plant Library_Waters_timsTOF CCS Measurements_STOW ET AL 01Nov18	2200	Bruker Sumner MetaboBASE Plant Library_Waters_timsTOF CCS Measurements_STOW ET AL 01Nov18	326.57	1.111	TRUE	245	327	387
2.56	194.5	167.035	168.042	[M-H]-	Vanillic acid	C8H8O4	Analyte List - Bruker Sumner MetaboBASE Plant Library_Waters_timsTOF CCS Measurements_STOW ET AL 01Nov18	2200	Bruker Sumner MetaboBASE Plant Library_Waters_timsTOF CCS Measurements_STOW ET AL 01Nov18	560.939	0.899	TRUE	561	763	471
12.79	315.4	1059.5	1060.51	[M-H]-	Hex-hex-hex-Mal-Bayogenin (PUT)	C51H80O23	Analyte List - Bruker Sumner MetaboBASE Plant Library_Waters_timsTOF CCS Measurements_STOW ET AL 01Nov18	2200	Bruker Sumner MetaboBASE Plant Library_Waters_timsTOF CCS Measurements_STOW ET AL 01Nov18	384.388	1.554	TRUE	560	185	384
29.33	167.9	253.218	254.225	[M-H]-	9-Trans-Palmitelaidic acid	C16H30O2	Analyte List - Bruker Sumner MetaboBASE Plant Library_Waters_timsTOF CCS Measurements_STOW ET AL 01Nov18	2200	Bruker Sumner MetaboBASE Plant Library_Waters_timsTOF CCS Measurements_STOW ET AL 01Nov18	936.127	0.796	TRUE	990	574	936
12.98	247.9	825.428	826.435	[M-H]-	3-Glu-28-Glu Medicagenic acid (NMR)	C42H66O16	Analyte List - Bruker Sumner MetaboBASE Plant Library_Waters_timsTOF CCS Measurements_STOW ET AL 01Nov18	2200	Bruker Sumner MetaboBASE Plant Library_Waters_timsTOF CCS Measurements_STOW ET AL 01Nov18	2070.99	1.218	TRUE	2071	1434	2433
13	172.1	825.428	826.435	[M-H]-	3-Glu-28-Glu Medicagenic acid (NMR)	C42H66O16	Analyte List - Bruker Sumner MetaboBASE Plant Library_Waters_timsTOF CCS Measurements_STOW ET AL 01Nov18	2200	Bruker Sumner MetaboBASE Plant Library_Waters_timsTOF CCS Measurements_STOW ET AL 01Nov18	3478.41	0.845	TRUE	3077	3698	3478
13.65	216.9	809.433	810.44	[M-H]-	Hex-hex-Polygalagenin (PUT)	C42H66O15	Analyte List - Bruker Sumner MetaboBASE Plant Library_Waters_timsTOF CCS Measurements_STOW ET AL 01Nov18	2200	Bruker Sumner MetaboBASE Plant Library_Waters_timsTOF CCS Measurements_STOW ET AL 01Nov18	525.318	1.065	TRUE	790	0	525
20.9	212	474.262	475.27	[M-H]-	1-Hydroxy-2-(9Z,12Z,15Z-octadecatrienoyl)-sn-glycero-3-phosphoethanolamine (NMR)	C23H42NO7P	Analyte List - Bruker Sumner MetaboBASE Plant Library_Waters_timsTOF CCS Measurements_STOW ET AL 01Nov18	2200	Bruker Sumner MetaboBASE Plant Library_Waters_timsTOF CCS Measurements_STOW ET AL 01Nov18	595.703	1.029	TRUE	747	596	574
18.68	234.3	939.496	940.503	[M-H]-	3-Rha(1-2)Gal(1-2)GluA-Soyasaponenol E (NMR)	C48H76O18	Analyte List - Bruker Sumner MetaboBASE Plant Library_Waters_timsTOF CCS Measurements_STOW ET AL 01Nov18	2200	Bruker Sumner MetaboBASE Plant Library_Waters_timsTOF CCS Measurements_STOW ET AL 01Nov18	528.517	1.153	TRUE	282	529	587
9.62	235.3	515.119	516.126	[M-H]-	6'-Malonyl Ononin (NMR)	C25H24O12	Analyte List - Bruker Sumner MetaboBASE Plant Library_Waters_timsTOF CCS Measurements_STOW ET AL 01Nov18	2200	Bruker Sumner MetaboBASE Plant Library_Waters_timsTOF CCS Measurements_STOW ET AL 01Nov18	750.263	1.144	TRUE	785	735	750
29.76	182.2	303.234	304.241	[M-H]-	Arachidonic acid	C20H32O2	Analyte List - Bruker Sumner MetaboBASE Plant Library_Waters_timsTOF CCS Measurements_STOW ET AL 01Nov18	2200	Bruker Sumner MetaboBASE Plant Library_Waters_timsTOF CCS Measurements_STOW ET AL 01Nov18	629.435	0.871	TRUE	1007	629	543
12.86	310.8	1059.5	1060.51	[M-H]-	Hex-hex-hex-Mal-Bayogenin (PUT)	C51H80O23	Analyte List - Bruker Sumner MetaboBASE Plant Library_Waters_timsTOF CCS Measurements_STOW ET AL 01Nov18	2200	Bruker Sumner MetaboBASE Plant Library_Waters_timsTOF CCS Measurements_STOW ET AL 01Nov18	0	1.532	TRUE	0	0	406
12.14	210.7	675.231	676.238	[M-H]-	Icariin	C33H40O15	Analyte List - Bruker Sumner MetaboBASE Plant Library_Waters_timsTOF CCS Measurements_STOW ET AL 01Nov18	2200	Bruker Sumner MetaboBASE Plant Library_Waters_timsTOF CCS Measurements_STOW ET AL 01Nov18	1022.79	1.031	TRUE	2031	1023	668
12.05	258.9	267.066	268.073	[M-H]-	7-Hydroxy-3'-methoxyflavone	C16H12O4	Analyte List - Bruker Sumner MetaboBASE Plant Library_Waters_timsTOF CCS Measurements_STOW ET AL 01Nov18	2200	Bruker Sumner MetaboBASE Plant Library_Waters_timsTOF CCS Measurements_STOW ET AL 01Nov18	771.008	1.23	TRUE	784	623	771
24.5	171	269.212	270.219	[M-H]-	(Z)-3-Hydroxyhexadec-7-enoic acid (NMR)	C16H30O3	Analyte List - Bruker Sumner MetaboBASE Plant Library_Waters_timsTOF CCS Measurements_STOW ET AL 01Nov18	2110	Bruker Sumner MetaboBASE Plant Library_Waters_timsTOF CCS Measurements_STOW ET AL 01Nov18	2243.83	0.813	TRUE	2456	2137	2244
24.56	239.8	540.331	541.338	[M-H]-	Hexadecanoyl-hydroxy-sn-glycerophosphocholine (PUT)	C25H52NO9P	Analyte List - Bruker Sumner MetaboBASE Plant Library_Waters_timsTOF CCS Measurements_STOW ET AL 01Nov18	2110	Bruker Sumner MetaboBASE Plant Library_Waters_timsTOF CCS Measurements_STOW ET AL 01Nov18	7158.89	1.168	TRUE	6846	7159	8113
24.42	211.9	452.278	453.285	[M-H]-	Hexadecanoyl-hydroxy-sn-glyceroethanolamine (PUT)	C21H44NO7P	Analyte List - Bruker Sumner MetaboBASE Plant Library_Waters_timsTOF CCS Measurements_STOW ET AL 01Nov18	2110	Bruker Sumner MetaboBASE Plant Library_Waters_timsTOF CCS Measurements_STOW ET AL 01Nov18	8681.73	1.027	TRUE	7471	8682	9398
16.47	180.8	327.087	328.094	[M-H]-	Zapotinin	C18H16O6	Analyte List - Bruker Sumner MetaboBASE Plant Library_Waters_timsTOF CCS Measurements_STOW ET AL 01Nov18	2110	Bruker Sumner MetaboBASE Plant Library_Waters_timsTOF CCS Measurements_STOW ET AL 01Nov18	21396.2	0.866	TRUE	22321	21388	21396
17.96	319.6	1027.51	1028.52	[M-H]-	3-(4'O-Malonyl)Rha(1-2)Gal(1-2)GluA-Soyasaponenol B( NMR)	C51H80O21	Analyte List - Bruker Sumner MetaboBASE Plant Library_Waters_timsTOF CCS Measurements_STOW ET AL 01Nov18	2110	Bruker Sumner MetaboBASE Plant Library_Waters_timsTOF CCS Measurements_STOW ET AL 01Nov18	13382.7	1.575	TRUE	13422	11555	13383
13.27	306.3	867.438	868.445	[M-H]-	3-((3'-Malonyl)Xyl)-28-Glu Bayogenin (NMR)	C44H68O17	Analyte List - Bruker Sumner MetaboBASE Plant Library_Waters_timsTOF CCS Measurements_STOW ET AL 01Nov18	2110	Bruker Sumner MetaboBASE Plant Library_Waters_timsTOF CCS Measurements_STOW ET AL 01Nov18	579.262	1.505	TRUE	579	731	556
13.27	373.7	412.211	826.436	[M-H-H]2-	3-Glu-28-Glu Medicagenic acid (NMR)	C42H66O16	Analyte List - Bruker Sumner MetaboBASE Plant Library_Waters_timsTOF CCS Measurements_STOW ET AL 01Nov18	2110	Bruker Sumner MetaboBASE Plant Library_Waters_timsTOF CCS Measurements_STOW ET AL 01Nov18	9938.64	0.918	TRUE	9410	10707	9939
13.47	310.4	867.438	868.445	[M-H]-	3-((3'-Malonyl)Xyl)-28-Glu Bayogenin (NMR)	C44H68O17	Analyte List - Bruker Sumner MetaboBASE Plant Library_Waters_timsTOF CCS Measurements_STOW ET AL 01Nov18	2110	Bruker Sumner MetaboBASE Plant Library_Waters_timsTOF CCS Measurements_STOW ET AL 01Nov18	3766.64	1.526	TRUE	3984	3767	3668
6.01	184.2	445.077	446.084	[M-H]-	HexA-Apigenin (or Galangin or Genistein) (PUT)	C21H18O11	Analyte List - Bruker Sumner MetaboBASE Plant Library_Waters_timsTOF CCS Measurements_STOW ET AL 01Nov18	2110	Bruker Sumner MetaboBASE Plant Library_Waters_timsTOF CCS Measurements_STOW ET AL 01Nov18	1397.67	0.892	TRUE	1398	1343	1728
13.59	311.9	867.438	868.445	[M-H]-	3-((3'-Malonyl)Xyl)-28-Glu Bayogenin (NMR)	C44H68O17	Analyte List - Bruker Sumner MetaboBASE Plant Library_Waters_timsTOF CCS Measurements_STOW ET AL 01Nov18	2110	Bruker Sumner MetaboBASE Plant Library_Waters_timsTOF CCS Measurements_STOW ET AL 01Nov18	14818.1	1.533	TRUE	15154	14818	0
13.61	315	957.505	958.513	[M-H]-, [M+Cl]-	3-Glu(1-2)Glu-28-Glu Hederagenin (NMR)	C48H78O19	Analyte List - Bruker Sumner MetaboBASE Plant Library_Waters_timsTOF CCS Measurements_STOW ET AL 01Nov18	2110	Bruker Sumner MetaboBASE Plant Library_Waters_timsTOF CCS Measurements_STOW ET AL 01Nov18	72104.4	1.55	TRUE	72104	69447	74760
5.33	229.8	595.166	596.173	[M-H]-	Eriodictyol-7-neohesperidoside	C27H32O15	Analyte List - Bruker Sumner MetaboBASE Plant Library_Waters_timsTOF CCS Measurements_STOW ET AL 01Nov18	2110	Bruker Sumner MetaboBASE Plant Library_Waters_timsTOF CCS Measurements_STOW ET AL 01Nov18	2969.84	1.121	TRUE	2970	3101	2708
14.16	284.8	895.432	896.439	[M-H]-	Hex-hexA-Mal-Hederagenin (PUT)	C45H68O18	Analyte List - Bruker Sumner MetaboBASE Plant Library_Waters_timsTOF CCS Measurements_STOW ET AL 01Nov18	2110	Bruker Sumner MetaboBASE Plant Library_Waters_timsTOF CCS Measurements_STOW ET AL 01Nov18	15984.1	1.401	TRUE	16125	15122	15984
16.74	301.2	957.506	958.513	[M-H]-, [M-H-H]2-	3-Glc-Gal-GlcUA-Soyasapogenol B	C48H78O19	Analyte List - Bruker Sumner MetaboBASE Plant Library_Waters_timsTOF CCS Measurements_STOW ET AL 01Nov18	2110	Bruker Sumner MetaboBASE Plant Library_Waters_timsTOF CCS Measurements_STOW ET AL 01Nov18	8339.99	1.483	TRUE	8340	7940	9271
13.64	312.5	867.437	868.445	[M-H]-	3-((3'-Malonyl)Xyl)-28-Glu Bayogenin (NMR)	C44H68O17	Analyte List - Bruker Sumner MetaboBASE Plant Library_Waters_timsTOF CCS Measurements_STOW ET AL 01Nov18	2110	Bruker Sumner MetaboBASE Plant Library_Waters_timsTOF CCS Measurements_STOW ET AL 01Nov18	7487.7	1.536	TRUE	6936	7488	12724
19.19	263.5	633.4	634.406	[M-H]-, [M+Cl]-	3-GluA Soyasapogenol B (NMR)	C36H58O9	Analyte List - Bruker Sumner MetaboBASE Plant Library_Waters_timsTOF CCS Measurements_STOW ET AL 01Nov18	2110	Bruker Sumner MetaboBASE Plant Library_Waters_timsTOF CCS Measurements_STOW ET AL 01Nov18	20325.6	1.288	TRUE	18325	20326	22043
13.61	313.9	911.427	912.434	[M-H]-	3-(6'-O-Malonyl)-Glu-28-Glu Medicagenic acid (NMR)	C45H68O19	Analyte List - Bruker Sumner MetaboBASE Plant Library_Waters_timsTOF CCS Measurements_STOW ET AL 01Nov18	2110	Bruker Sumner MetaboBASE Plant Library_Waters_timsTOF CCS Measurements_STOW ET AL 01Nov18	7860.09	1.544	TRUE	7860	6402	9392
13.64	289.6	867.437	868.444	[M-H]-	3-((3'-Malonyl)Xyl)-28-Glu Bayogenin (NMR)	C44H68O17	Analyte List - Bruker Sumner MetaboBASE Plant Library_Waters_timsTOF CCS Measurements_STOW ET AL 01Nov18	2110	Bruker Sumner MetaboBASE Plant Library_Waters_timsTOF CCS Measurements_STOW ET AL 01Nov18	3259.99	1.423	TRUE	3260	3451	3070
17.76	306.9	911.5	912.507	[M-H]-	3-Rha-Ara-GlcUA-Soyasapogenol B	C47H76O17	Analyte List - Bruker Sumner MetaboBASE Plant Library_Waters_timsTOF CCS Measurements_STOW ET AL 01Nov18	2110	Bruker Sumner MetaboBASE Plant Library_Waters_timsTOF CCS Measurements_STOW ET AL 01Nov18	9916.82	1.509	TRUE	9620	11800	9917
12	297	973.5	974.508	[M-H]-, [M+Cl]-	3-Glu(1,3)Glu-28-Glu Bayogenin (NMR)	C48H78O20	Analyte List - Bruker Sumner MetaboBASE Plant Library_Waters_timsTOF CCS Measurements_STOW ET AL 01Nov18	2110	Bruker Sumner MetaboBASE Plant Library_Waters_timsTOF CCS Measurements_STOW ET AL 01Nov18	1763.64	1.462	TRUE	1839	1764	1393
15.26	300.3	811.447	812.454	[M-H]-	3-Ara-28-Glu Hederagenin (NMR)	C42H68O15	Analyte List - Bruker Sumner MetaboBASE Plant Library_Waters_timsTOF CCS Measurements_STOW ET AL 01Nov18	2110	Bruker Sumner MetaboBASE Plant Library_Waters_timsTOF CCS Measurements_STOW ET AL 01Nov18	18327.7	1.475	TRUE	17598	18721	18328
15.92	300.3	811.447	812.454	[M-H]-, [M+Cl]-	3-Ara-28-Glu Hederagenin (NMR)	C42H68O15	Analyte List - Bruker Sumner MetaboBASE Plant Library_Waters_timsTOF CCS Measurements_STOW ET AL 01Nov18	2110	Bruker Sumner MetaboBASE Plant Library_Waters_timsTOF CCS Measurements_STOW ET AL 01Nov18	3699.58	1.475	TRUE	3101	3983	3700
13.31	299.1	809.431	810.438	[M-H]-	Hex-hex-Polygalagenin (PUT)	C42H66O15	Analyte List - Bruker Sumner MetaboBASE Plant Library_Waters_timsTOF CCS Measurements_STOW ET AL 01Nov18	2110	Bruker Sumner MetaboBASE Plant Library_Waters_timsTOF CCS Measurements_STOW ET AL 01Nov18	14574.5	1.468	TRUE	13918	14575	14963
12.79	172.5	297.077	298.084	[M-H]-	3',4'-Dimethoxy-7-hydroxyflavanone	C17H14O5	Analyte List - Bruker Sumner MetaboBASE Plant Library_Waters_timsTOF CCS Measurements_STOW ET AL 01Nov18	2110	Bruker Sumner MetaboBASE Plant Library_Waters_timsTOF CCS Measurements_STOW ET AL 01Nov18	19253.9	0.824	TRUE	19602	19254	19140
28	174.4	277.217	278.225	[M-H]-	a-Linolenic acid (NMR)	C18H30O2	Analyte List - Bruker Sumner MetaboBASE Plant Library_Waters_timsTOF CCS Measurements_STOW ET AL 01Nov18	2110	Bruker Sumner MetaboBASE Plant Library_Waters_timsTOF CCS Measurements_STOW ET AL 01Nov18	7954.41	0.83	TRUE	8420	7168	7954
7.88	215.7	255.066	256.073	[M-H]-	Demethyl medicarpin	C15H12O4	Analyte List - Bruker Sumner MetaboBASE Plant Library_Waters_timsTOF CCS Measurements_STOW ET AL 01Nov18	2110	Bruker Sumner MetaboBASE Plant Library_Waters_timsTOF CCS Measurements_STOW ET AL 01Nov18	1951.09	1.023	TRUE	1951	2242	0
11.36	160.2	255.066	256.073	[M-H]-	Isoliquiritigenin	C15H12O4	Analyte List - Bruker Sumner MetaboBASE Plant Library_Waters_timsTOF CCS Measurements_STOW ET AL 01Nov18	2100	Bruker Sumner MetaboBASE Plant Library_Waters_timsTOF CCS Measurements_STOW ET AL 01Nov18	1149.34	0.759	TRUE	2585	1149	727
15.46	299.1	811.446	812.454	[M-H]-	3-Ara-28-Glu Hederagenin (NMR)	C42H68O15	Analyte List - Bruker Sumner MetaboBASE Plant Library_Waters_timsTOF CCS Measurements_STOW ET AL 01Nov18	1210	Bruker Sumner MetaboBASE Plant Library_Waters_timsTOF CCS Measurements_STOW ET AL 01Nov18	22222	1.468	TRUE	22222	19568	24361
13.45	289.4	897.448	898.455	[M-H]-	Hex-hex-Mal-Bayogenin (isomer 2) (PUT)	C45H70O18	Analyte List - Bruker Sumner MetaboBASE Plant Library_Waters_timsTOF CCS Measurements_STOW ET AL 01Nov18	1210	Bruker Sumner MetaboBASE Plant Library_Waters_timsTOF CCS Measurements_STOW ET AL 01Nov18	3999.61	1.423	TRUE	3732	4066	4000
17.76	297.9	795.452	796.459	[M-H]-	3-Gal(1-2)GluA Soyasapogenol B (NMR)	C42H68O14	Analyte List - Bruker Sumner MetaboBASE Plant Library_Waters_timsTOF CCS Measurements_STOW ET AL 01Nov18	1210	Bruker Sumner MetaboBASE Plant Library_Waters_timsTOF CCS Measurements_STOW ET AL 01Nov18	11608.3	1.462	TRUE	11196	11608	12399
13.78	190.2	971.484	972.492	[M-H]-	Hex-Hex-hexA-hederagenin (or Hex-Hex-HexA-2-hydroxyoleanolic acid) (peak 2) (Put)	C55H72O15	Analyte List - Bruker Sumner MetaboBASE Plant Library_Waters_timsTOF CCS Measurements_STOW ET AL 01Nov18	1210	Bruker Sumner MetaboBASE Plant Library_Waters_timsTOF CCS Measurements_STOW ET AL 01Nov18	6839.35	0.937	TRUE	6606	7897	6839
13.77	311.2	971.484	972.492	[M-H]-	Hex-Hex-hexA-hederagenin (or Hex-Hex-HexA-2-hydroxyoleanolic acid) (peak 2) (Put)	C55H72O15	Analyte List - Bruker Sumner MetaboBASE Plant Library_Waters_timsTOF CCS Measurements_STOW ET AL 01Nov18	1210	Bruker Sumner MetaboBASE Plant Library_Waters_timsTOF CCS Measurements_STOW ET AL 01Nov18	32230.7	1.532	TRUE	32231	33089	30808
15.27	299.5	971.485	972.492	[M-H]-	Hex-hexA-dhex Bayogenin (PUT)	C55H72O15	Analyte List - Bruker Sumner MetaboBASE Plant Library_Waters_timsTOF CCS Measurements_STOW ET AL 01Nov18	1210	Bruker Sumner MetaboBASE Plant Library_Waters_timsTOF CCS Measurements_STOW ET AL 01Nov18	14139.6	1.475	TRUE	14140	14325	13523
13.64	290.6	911.426	912.433	[M-H]-	3-(6'-O-Malonyl)-Glu-28-Glu Medicagenic acid (NMR)	C45H68O19	Analyte List - Bruker Sumner MetaboBASE Plant Library_Waters_timsTOF CCS Measurements_STOW ET AL 01Nov18	1120	Bruker Sumner MetaboBASE Plant Library_Waters_timsTOF CCS Measurements_STOW ET AL 01Nov18	9842.19	1.429	TRUE	9842	6647	11691
8.61	169.3	299.052	300.059	[M-H]-	Sorbifolin	C16H12O6	Analyte List - Bruker Sumner MetaboBASE Plant Library_Waters_timsTOF CCS Measurements_STOW ET AL 01Nov18	1110	Bruker Sumner MetaboBASE Plant Library_Waters_timsTOF CCS Measurements_STOW ET AL 01Nov18	1225.5	0.809	TRUE	1145	1422	1226
13.1	301.5	825.431	826.438	[M-H]-	3-Glu-28-Glu Medicagenic acid (NMR)	C42H66O16	Analyte List - Bruker Sumner MetaboBASE Plant Library_Waters_timsTOF CCS Measurements_STOW ET AL 01Nov18	1100	Bruker Sumner MetaboBASE Plant Library_Waters_timsTOF CCS Measurements_STOW ET AL 01Nov18	983.197	1.481	TRUE	983	0	1533
23.85	170.6	269.212	270.22	[M-H]-	(Z)-3-Hydroxyhexadec-7-enoic acid (NMR)	C16H30O3	Analyte List - Bruker Sumner MetaboBASE Plant Library_Waters_timsTOF CCS Measurements_STOW ET AL 01Nov18	2100	Bruker Sumner MetaboBASE Plant Library_Waters_timsTOF CCS Measurements_STOW ET AL 01Nov18	1972.74	0.811	TRUE	1680	2076	1973
23.64	170.1	269.212	270.22	[M-H]-	(Z)-3-Hydroxyhexadec-7-enoic acid (NMR)	C16H30O3	Analyte List - Bruker Sumner MetaboBASE Plant Library_Waters_timsTOF CCS Measurements_STOW ET AL 01Nov18	2100	Bruker Sumner MetaboBASE Plant Library_Waters_timsTOF CCS Measurements_STOW ET AL 01Nov18	0	0.809	TRUE	476	0	0
9.86	169.2	269.082	270.089	[M-H]-	8-Hydroxy-5-methoxyflavanone	C16H14O4	Analyte List - Bruker Sumner MetaboBASE Plant Library_Waters_timsTOF CCS Measurements_STOW ET AL 01Nov18	2100	Bruker Sumner MetaboBASE Plant Library_Waters_timsTOF CCS Measurements_STOW ET AL 01Nov18	801.522	0.804	TRUE	624	830	802
8.17	176.9	149.061	150.068	[M-H]-	Hydrocinnamic acid	C9H10O2	Analyte List - Bruker Sumner MetaboBASE Plant Library_Waters_timsTOF CCS Measurements_STOW ET AL 01Nov18	2100	Bruker Sumner MetaboBASE Plant Library_Waters_timsTOF CCS Measurements_STOW ET AL 01Nov18	763.968	0.811	TRUE	661	764	778
27.9	179.3	297.244	298.251	[M-H]-	(Z)-3-Hydroxyoctadec-7-enoic acid (NMR)	C18H34O3	Analyte List - Bruker Sumner MetaboBASE Plant Library_Waters_timsTOF CCS Measurements_STOW ET AL 01Nov18	2100	Bruker Sumner MetaboBASE Plant Library_Waters_timsTOF CCS Measurements_STOW ET AL 01Nov18	810.164	0.856	TRUE	786	810	820
5.74	206.1	431.098	432.105	[M-H]-	Genistin	C21H20O10	Analyte List - Bruker Sumner MetaboBASE Plant Library_Waters_timsTOF CCS Measurements_STOW ET AL 01Nov18	2100	Bruker Sumner MetaboBASE Plant Library_Waters_timsTOF CCS Measurements_STOW ET AL 01Nov18	471.474	0.997	TRUE	471	362	487
13.46	177.2	867.438	868.445	[M-H]-	3-((3'-Malonyl)Xyl)-28-Glu Bayogenin (NMR)	C44H68O17	Analyte List - Bruker Sumner MetaboBASE Plant Library_Waters_timsTOF CCS Measurements_STOW ET AL 01Nov18	2100	Bruker Sumner MetaboBASE Plant Library_Waters_timsTOF CCS Measurements_STOW ET AL 01Nov18	859.614	0.871	TRUE	874	860	709
10.86	314.1	957.507	958.514	[M-H]-	Asiaticoside	C48H78O19	Analyte List - Bruker Sumner MetaboBASE Plant Library_Waters_timsTOF CCS Measurements_STOW ET AL 01Nov18	2100	Bruker Sumner MetaboBASE Plant Library_Waters_timsTOF CCS Measurements_STOW ET AL 01Nov18	627.326	1.546	TRUE	559	627	705
18.41	320.5	1027.51	1028.52	[M-H]-	3-(4'O-Malonyl)Rha(1-2)Gal(1-2)GluA-Soyasaponenol B( NMR)	C51H80O21	Analyte List - Bruker Sumner MetaboBASE Plant Library_Waters_timsTOF CCS Measurements_STOW ET AL 01Nov18	2100	Bruker Sumner MetaboBASE Plant Library_Waters_timsTOF CCS Measurements_STOW ET AL 01Nov18	1404.38	1.579	TRUE	1043	1404	1920
12.26	166.1	269.045	270.052	[M-H]-	5,3',4'-Trihydroxyflavone	C15H10O5	Analyte List - Bruker Sumner MetaboBASE Plant Library_Waters_timsTOF CCS Measurements_STOW ET AL 01Nov18	2100	Bruker Sumner MetaboBASE Plant Library_Waters_timsTOF CCS Measurements_STOW ET AL 01Nov18	493.912	0.789	TRUE	494	456	680
10.48	236.1	299.092	300.099	[M-H]-	5,7-Dimethoxy-4'-hydroxyflavanone	C17H16O5	Analyte List - Bruker Sumner MetaboBASE Plant Library_Waters_timsTOF CCS Measurements_STOW ET AL 01Nov18	2100	Bruker Sumner MetaboBASE Plant Library_Waters_timsTOF CCS Measurements_STOW ET AL 01Nov18	910.501	1.128	TRUE	889	1119	911
10.72	165.2	301.071	302.078	[M-H]-	Hesperetin	C16H14O6	Analyte List - Bruker Sumner MetaboBASE Plant Library_Waters_timsTOF CCS Measurements_STOW ET AL 01Nov18	2100	Bruker Sumner MetaboBASE Plant Library_Waters_timsTOF CCS Measurements_STOW ET AL 01Nov18	637.272	0.789	TRUE	898	578	637
10.06	212	445.115	446.122	[M-H]-	Sissotrin	C22H22O10	Analyte List - Bruker Sumner MetaboBASE Plant Library_Waters_timsTOF CCS Measurements_STOW ET AL 01Nov18	2100	Bruker Sumner MetaboBASE Plant Library_Waters_timsTOF CCS Measurements_STOW ET AL 01Nov18	517.425	1.027	TRUE	517	590	443
8.57	228.7	459.129	460.136	[M-H]-	6,4'-Dimethoxyisoflavone-7-glucoside (Wistin)	C23H24O10	Analyte List - Bruker Sumner MetaboBASE Plant Library_Waters_timsTOF CCS Measurements_STOW ET AL 01Nov18	2100	Bruker Sumner MetaboBASE Plant Library_Waters_timsTOF CCS Measurements_STOW ET AL 01Nov18	811.627	1.109	TRUE	812	696	1050
26.41	174.1	271.227	272.234	[M-H]-	3-Hydroxyhexadecanoic acid (NMR)	C16H32O3	Analyte List - Bruker Sumner MetaboBASE Plant Library_Waters_timsTOF CCS Measurements_STOW ET AL 01Nov18	2100	Bruker Sumner MetaboBASE Plant Library_Waters_timsTOF CCS Measurements_STOW ET AL 01Nov18	327.748	0.828	TRUE	281	328	401
8.75	230	459.129	460.136	[M-H]-	6,4'-Dimethoxyisoflavone-7-glucoside (Wistin)	C23H24O10	Analyte List - Bruker Sumner MetaboBASE Plant Library_Waters_timsTOF CCS Measurements_STOW ET AL 01Nov18	2100	Bruker Sumner MetaboBASE Plant Library_Waters_timsTOF CCS Measurements_STOW ET AL 01Nov18	373.79	1.115	TRUE	358	374	513
12.8	198.4	957.505	958.513	[M-H]-	3-Glu(1-2)Glu-28-Glu Hederagenin (NMR)	C48H78O19	Analyte List - Bruker Sumner MetaboBASE Plant Library_Waters_timsTOF CCS Measurements_STOW ET AL 01Nov18	2100	Bruker Sumner MetaboBASE Plant Library_Waters_timsTOF CCS Measurements_STOW ET AL 01Nov18	427.479	0.976	TRUE	427	637	353
15.94	270.3	793.437	794.444	[M-H]-	3-GlcA-28-Glc oleanolic acid (NMR)	C42H66O14	Analyte List - Bruker Sumner MetaboBASE Plant Library_Waters_timsTOF CCS Measurements_STOW ET AL 01Nov18	2100	Bruker Sumner MetaboBASE Plant Library_Waters_timsTOF CCS Measurements_STOW ET AL 01Nov18	560.435	1.327	TRUE	677	560	534
14.36	291.6	927.495	928.502	[M-H]-	3-Glu-(1-2)Ara-28-Glu Hederagenin (NMR)	C47H76O18	Analyte List - Bruker Sumner MetaboBASE Plant Library_Waters_timsTOF CCS Measurements_STOW ET AL 01Nov18	2100	Bruker Sumner MetaboBASE Plant Library_Waters_timsTOF CCS Measurements_STOW ET AL 01Nov18	457.836	1.435	TRUE	0	458	665
24.23	171.9	269.211	270.218	[M-H]-	(Z)-3-Hydroxyhexadec-7-enoic acid (NMR)	C16H30O3	Analyte List - Bruker Sumner MetaboBASE Plant Library_Waters_timsTOF CCS Measurements_STOW ET AL 01Nov18	2100	Bruker Sumner MetaboBASE Plant Library_Waters_timsTOF CCS Measurements_STOW ET AL 01Nov18	441.154	0.817	TRUE	441	529	85
10.99	228	281.044	282.052	[M-H]-	Pseudobaptigenin	C16H10O5	Analyte List - Bruker Sumner MetaboBASE Plant Library_Waters_timsTOF CCS Measurements_STOW ET AL 01Nov18	2100	Bruker Sumner MetaboBASE Plant Library_Waters_timsTOF CCS Measurements_STOW ET AL 01Nov18	654.577	1.086	TRUE	655	765	623
13.59	237.1	867.437	868.444	[M-H]-	3-((3'-Malonyl)Xyl)-28-Glu Bayogenin (NMR)	C44H68O17	Analyte List - Bruker Sumner MetaboBASE Plant Library_Waters_timsTOF CCS Measurements_STOW ET AL 01Nov18	2100	Bruker Sumner MetaboBASE Plant Library_Waters_timsTOF CCS Measurements_STOW ET AL 01Nov18	972.769	1.165	TRUE	973	1012	860
12.77	305	867.437	868.444	[M-H]-	3-((3'-Malonyl)Xyl)-28-Glu Bayogenin (NMR)	C44H68O17	Analyte List - Bruker Sumner MetaboBASE Plant Library_Waters_timsTOF CCS Measurements_STOW ET AL 01Nov18	2100	Bruker Sumner MetaboBASE Plant Library_Waters_timsTOF CCS Measurements_STOW ET AL 01Nov18	777.341	1.499	TRUE	777	597	902
13.61	243.6	957.504	958.512	[M-H]-	3-Glu(1-2)Glu-28-Glu Hederagenin (NMR)	C48H78O19	Analyte List - Bruker Sumner MetaboBASE Plant Library_Waters_timsTOF CCS Measurements_STOW ET AL 01Nov18	2100	Bruker Sumner MetaboBASE Plant Library_Waters_timsTOF CCS Measurements_STOW ET AL 01Nov18	1419.58	1.199	TRUE	1420	1516	1256
7.89	188.2	255.066	256.074	[M-H]-	Demethyl medicarpin	C15H12O4	Analyte List - Bruker Sumner MetaboBASE Plant Library_Waters_timsTOF CCS Measurements_STOW ET AL 01Nov18	2100	Bruker Sumner MetaboBASE Plant Library_Waters_timsTOF CCS Measurements_STOW ET AL 01Nov18	766.745	0.892	TRUE	767	902	688
29.98	254.9	279.232	280.24	[M-H]-	9Z,12Z-Linoleic acid (NMR)	C18H32O2	Analyte List - Bruker Sumner MetaboBASE Plant Library_Waters_timsTOF CCS Measurements_STOW ET AL 01Nov18	2100	Bruker Sumner MetaboBASE Plant Library_Waters_timsTOF CCS Measurements_STOW ET AL 01Nov18	529.345	1.213	TRUE	710	0	529
13.47	322.3	1205.56	1206.57	[M-H]-	3-Glu-28-Xyl(1-4)[Api(1-3)]Rha(1-2)Ara Medicagenic acid (NMR)	C57H90O27	Analyte List - Bruker Sumner MetaboBASE Plant Library_Waters_timsTOF CCS Measurements_STOW ET AL 01Nov18	1200	Bruker Sumner MetaboBASE Plant Library_Waters_timsTOF CCS Measurements_STOW ET AL 01Nov18	781.637	1.591	TRUE	782	674	1101
18.7	239.4	939.5	940.507	[M-H]-	3-Rha(1-2)Gal(1-2)GluA-Soyasaponenol E (NMR)	C48H76O18	Analyte List - Bruker Sumner MetaboBASE Plant Library_Waters_timsTOF CCS Measurements_STOW ET AL 01Nov18	1200	Bruker Sumner MetaboBASE Plant Library_Waters_timsTOF CCS Measurements_STOW ET AL 01Nov18	0	1.178	TRUE	0	0	1246
12.89	237.1	971.484	972.492	[M-H]-	Hex-Hex-hexA-hederagenin (or Hex-Hex-HexA-2-hydroxyoleanolic acid) (peak 1) (Put)	C55H72O15	Analyte List - Bruker Sumner MetaboBASE Plant Library_Waters_timsTOF CCS Measurements_STOW ET AL 01Nov18	1200	Bruker Sumner MetaboBASE Plant Library_Waters_timsTOF CCS Measurements_STOW ET AL 01Nov18	405.94	1.168	TRUE	430	406	0
17.28	313.8	941.51	942.517	[M-H]-, [M+Cl]-	3-Rha(1-2)Gal(1-2)GluA-Soyasaponenol B (NMR)	C48H78O18	Analyte List - Bruker Sumner MetaboBASE Plant Library_Waters_timsTOF CCS Measurements_STOW ET AL 01Nov18	1110	Bruker Sumner MetaboBASE Plant Library_Waters_timsTOF CCS Measurements_STOW ET AL 01Nov18	653116	1.544	TRUE	653116	603293	756068
4.44	207.7	415.106	416.113	[M-H]-	Daidzin	C21H20O9	Analyte List - Bruker Sumner MetaboBASE Plant Library_Waters_timsTOF CCS Measurements_STOW ET AL 01Nov18	1110	Bruker Sumner MetaboBASE Plant Library_Waters_timsTOF CCS Measurements_STOW ET AL 01Nov18	1453.71	1.004	TRUE	1269	1454	1466
16.21	296.3	793.436	794.443	[M-H]-	3-GlcA-28-Glc oleanolic acid (NMR)	C42H66O14	Analyte List - Bruker Sumner MetaboBASE Plant Library_Waters_timsTOF CCS Measurements_STOW ET AL 01Nov18	1110	Bruker Sumner MetaboBASE Plant Library_Waters_timsTOF CCS Measurements_STOW ET AL 01Nov18	1346.41	1.454	TRUE	1346	1145	1378
13.34	315	957.504	958.51	[M-H]-, [M+Cl]-	3-Glu(1-2)Glu-28-Glu Hederagenin (NMR)	C48H78O19	Analyte List - Bruker Sumner MetaboBASE Plant Library_Waters_timsTOF CCS Measurements_STOW ET AL 01Nov18	1110	Bruker Sumner MetaboBASE Plant Library_Waters_timsTOF CCS Measurements_STOW ET AL 01Nov18	16327.4	1.55	TRUE	17611	15931	16327
13.13	310.7	987.484	988.491	[M-H]-	3-Glu(1-3)Glu-28-Glu Medicagenic acid (NMR)	C48H76O21	Analyte List - Bruker Sumner MetaboBASE Plant Library_Waters_timsTOF CCS Measurements_STOW ET AL 01Nov18	1110	Bruker Sumner MetaboBASE Plant Library_Waters_timsTOF CCS Measurements_STOW ET AL 01Nov18	1041.6	1.53	TRUE	1024	1042	1095
12.59	297.4	971.485	972.492	[M-H]-	Hex-Hex-hexA-hederagenin (or Hex-Hex-HexA-2-hydroxyoleanolic acid) (peak 1) (Put)	C55H72O15	Analyte List - Bruker Sumner MetaboBASE Plant Library_Waters_timsTOF CCS Measurements_STOW ET AL 01Nov18	1110	Bruker Sumner MetaboBASE Plant Library_Waters_timsTOF CCS Measurements_STOW ET AL 01Nov18	18614.8	1.464	TRUE	19644	18615	16614
12.58	315.7	971.485	972.492	[M-H]-, [M+Cl]-	Hex-Hex-hexA-hederagenin (or Hex-Hex-HexA-2-hydroxyoleanolic acid) (peak 1) (Put)	C55H72O15	Analyte List - Bruker Sumner MetaboBASE Plant Library_Waters_timsTOF CCS Measurements_STOW ET AL 01Nov18	1110	Bruker Sumner MetaboBASE Plant Library_Waters_timsTOF CCS Measurements_STOW ET AL 01Nov18	88706.4	1.554	TRUE	88706	96074	87600
9.65	162	271.059	272.066	[M-H]-	Naringenin	C15H12O5	Analyte List - Bruker Sumner MetaboBASE Plant Library_Waters_timsTOF CCS Measurements_STOW ET AL 01Nov18	1100	Bruker Sumner MetaboBASE Plant Library_Waters_timsTOF CCS Measurements_STOW ET AL 01Nov18	663.924	0.77	TRUE	684	664	300
12.77	315.2	987.478	988.486	[M-H]-	3-Glu(1-3)Glu-28-Glu Medicagenic acid (NMR)	C48H76O21	Analyte List - Bruker Sumner MetaboBASE Plant Library_Waters_timsTOF CCS Measurements_STOW ET AL 01Nov18	1100	Bruker Sumner MetaboBASE Plant Library_Waters_timsTOF CCS Measurements_STOW ET AL 01Nov18	430.039	1.552	TRUE	430	278	610
14.07	295.2	909.41	910.417	[M-H]-	Hex-hexA-Mal-Gypsogenic acid (or Polygalagenin) (PUT)	C45H66O19	Analyte List - Bruker Sumner MetaboBASE Plant Library_Waters_timsTOF CCS Measurements_STOW ET AL 01Nov18	1100	Bruker Sumner MetaboBASE Plant Library_Waters_timsTOF CCS Measurements_STOW ET AL 01Nov18	373.041	1.452	TRUE	0	539	373
17.29	314.3	957.503	958.51	[M-H]-	3-Glc-Gal-GlcUA-Soyasapogenol B	C48H78O19	Analyte List - Bruker Sumner MetaboBASE Plant Library_Waters_timsTOF CCS Measurements_STOW ET AL 01Nov18	1100	Bruker Sumner MetaboBASE Plant Library_Waters_timsTOF CCS Measurements_STOW ET AL 01Nov18	762.001	1.547	TRUE	762	1060	0
17.31	314.5	957.503	958.51	[M-H]-	3-Glc-Gal-GlcUA-Soyasapogenol B	C48H78O19	Analyte List - Bruker Sumner MetaboBASE Plant Library_Waters_timsTOF CCS Measurements_STOW ET AL 01Nov18	1100	Bruker Sumner MetaboBASE Plant Library_Waters_timsTOF CCS Measurements_STOW ET AL 01Nov18	1041.05	1.548	TRUE	1828	922	1041
17.22	244.5	941.508	942.515	[M-H]-	3-Rha(1-2)Gal(1-2)GluA-Soyasaponenol B (NMR)	C48H78O18	Analyte List - Bruker Sumner MetaboBASE Plant Library_Waters_timsTOF CCS Measurements_STOW ET AL 01Nov18	1100	Bruker Sumner MetaboBASE Plant Library_Waters_timsTOF CCS Measurements_STOW ET AL 01Nov18	139.601	1.203	TRUE	358	0	140
12.96	257.8	957.502	958.51	[M-H]-	3-Glu(1-2)Glu-28-Glu Hederagenin (NMR)	C48H78O19	Analyte List - Bruker Sumner MetaboBASE Plant Library_Waters_timsTOF CCS Measurements_STOW ET AL 01Nov18	1100	Bruker Sumner MetaboBASE Plant Library_Waters_timsTOF CCS Measurements_STOW ET AL 01Nov18	700.502	1.269	TRUE	701	1043	516
16.04	295.8	793.434	794.441	[M-H]-	3-GlcA-28-Glc oleanolic acid (NMR)	C42H66O14	Analyte List - Bruker Sumner MetaboBASE Plant Library_Waters_timsTOF CCS Measurements_STOW ET AL 01Nov18	1100	Bruker Sumner MetaboBASE Plant Library_Waters_timsTOF CCS Measurements_STOW ET AL 01Nov18	330.313	1.452	TRUE	202	330	352
